# Supplementary material for: Replacing dichloroethane as a solvent for rhodium-catalysed intermolecular alkyne hydroacylation reactions: the utility of propylene carbonate
Source: Royal Society of Chemistry journal article supplement (doi:10.1039/c1gc15293a), 2011-01-01
Supplement: c1gc15293a.pdf [file c1gc15293a.pdf]

# Replacing dichloroethane as a solvent for rhodium-catalysed intermolecular alkyne hydroacylation reactions: The utility of propylene carbonate

Philip Lenden, Paul M. Ylloja, Carlos González-Rodríguez, David A. Entwistle and Michael C. Willis\*

Department of Chemistry, University of Oxford, Chemistry Research Laboratory, Mansfield Road, Oxford, OX1 3TA, UK

## Supporting Information

### General considerations

Reactions were performed under an inert atmosphere of nitrogen with technical grade solvent unless otherwise stated. All glassware was oven dried at >100 °C and allowed to cool to room temperature under a positive nitrogen pressure. Cooling of reactions to 0 °C was achieved using an ice-water bath and cooling to -40 °C was achieved using a dry ice-acetone bath. Reactions were monitored by TLC until deemed complete using aluminium backed silica plates. Plates were visualised under ultraviolet light and/or by staining with KMnO<sub>4</sub>. Reagents were purchased from Sigma-Aldrich Chemical Co. Ltd., Acros Organics Ltd., Lancaster Synthesis Ltd, or Strem Chemicals Inc. and were used as supplied unless otherwise stated. Dry tetrahydrofuran was obtained by passing through anhydrous alumina columns using an Innovative Technology Inc. PS-400-7 solvent purification system. 3-(methylthio)propionaldehyde and 2-(methylthio)benzaldehyde were distilled under reduced pressure prior to use. Petroleum ether refers to the fraction obtained between 30 and 40 °C. Flash chromatography was carried out using matrix 60 silica, pressure was applied at the column head *via* hand bellows. Infra-red spectra were recorded using NaCl discs on a Perkin-Elmer Spectrum One FT-IR or a Bruker Tensor 27 FT-IR spectrometer. <sup>1</sup>H NMR spectra were obtained on a Bruker DPX-200 (200 MHz), Bruker DQX-400 (400 MHz) or Bruker AVC-500 (500 MHz) spectrometer using the residual solvent as an internal standard. <sup>13</sup>C NMR spectra were obtained on a Bruker DQX-400 (100 MHz) or Bruker AVC-500 (125 MHz) spectrometer using the residual solvent as an internal standard. Chemical shifts were reported in parts per million (ppm) with the multiplicities of the spectra reported as following: singlet (s), doublet (d), triplet (t), quartet (q), multiplet (m) and broad (br). Mass spectrometry measurements were recorded by the internal service at the Department of Organic Chemistry, University of Oxford.

## Hept-2-ynal

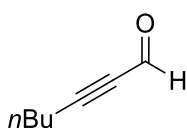

Prepared according to a procedure described by Journet *et al.*<sup>1</sup> *n*BuLi (2.5M in hexanes, 8.0 mL, 20 mmol) added over 2 minutes to a solution of 1-hexyne (3.3 mL, 20 mmol) in dry THF (50 mL) at -40 °C. DMF (3.1 mL, 40 mmol) added in one portion and the reaction mixture was allowed to warm to room temperature over 30 minutes, before being added to a rapidly stirred mixture of Et<sub>2</sub>O (140 mL) and NaH<sub>2</sub>PO<sub>4</sub> (14.2 g, 80 mmol) in water (140 mL) at 0 °C. The organic phase was separated and washed with water (2 x 40 mL), and the combined aqueous washes back-extracted into Et<sub>2</sub>O. The combined organic extracts were dried over MgSO<sub>4</sub>, concentrated *in vacuo* and purified by column chromatography (20% Et<sub>2</sub>O in petrol) to furnish the aldehyde as a light yellow oil (1.68 g, 76%).  $\nu_{\max}$  (film)/cm<sup>-1</sup> 2961, 2937, 2873, 2281, 2203, 1671; <sup>1</sup>H NMR (400 MHz, CDCl<sub>3</sub>)  $\delta_{\text{H}}$  9.17 (s, 1H), 2.41 (t, *J* = 7.1 Hz, 2H), 1.58 (tt, *J* = 7.6, 6.8 Hz, 2H), 1.44 (sxt, *J* = 7.58 Hz, 2H) and 0.93 (t, *J* = 7.3 Hz, 3H); <sup>13</sup>C NMR (101 MHz, CDCl<sub>3</sub>)  $\delta_{\text{C}}$  177.2, 99.3, 81.7, 29.5, 21.9, 18.8 and 13.4; HRMS (FI) found *m/z* 111.0810 [M+H]<sup>+</sup>, C<sub>7</sub>H<sub>11</sub>O requires 111.0810.

## 2-(2-butyl-1,3-dithian-2-yl)acetaldehyde

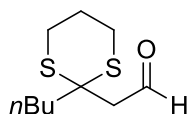

A solution of hept-2-ynal (3.10 g, 28 mmol) in THF (280 mL) was cooled to 0 °C, followed by the addition of 1,3-propanedithiol (3.11 mL, 31 mmol) then NaOMe (1.97 g, 36 mmol). The reaction mixture was allowed to warm to room temperature overnight, then quenched with saturated aqueous NH<sub>4</sub>Cl. The phases were separated and the aqueous phase extracted into Et<sub>2</sub>O (2 x 100 mL). The combined organic extracts were washed with water then brine, dried over MgSO<sub>4</sub> and concentrated *in vacuo*. The crude product was washed with saturated aqueous CuSO<sub>4</sub> then purified by column chromatography (20% Et<sub>2</sub>O in petrol) to provide the aldehyde as a bright yellow oil (2.92 g, 48%).  $\nu_{\max}$  (film)/cm<sup>-1</sup> 2955, 2934, 1718; <sup>1</sup>H NMR (500 MHz, CDCl<sub>3</sub>)  $\delta_{\text{H}}$  9.78 (t, *J* = 2.7 Hz, 1H), 2.94-2.80 (m, 6H), 2.09-1.88 (m, 4H), 1.55-1.46 (m, 2H), 1.40-1.30 (m, 2H), 0.93 (t, *J* = 7.3 Hz, 3H); <sup>13</sup>C NMR (101 MHz, CDCl<sub>3</sub>)  $\delta_{\text{C}}$  199.8, 50.1, 49.2, 40.2, 26.2, 26.1, 24.7, 22.8, 13.9; HRMS (ESI) found *m/z* 273.0953 [M+Na]<sup>+</sup>, C<sub>11</sub>H<sub>22</sub>NaO<sub>2</sub>S<sub>2</sub> requires 273.0953.

### General procedure, as exemplified by the preparation of (*E*)-5-(methylthio)-1-phenylpent-1-en-3-one

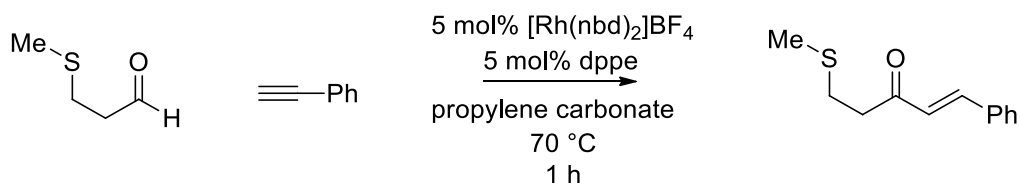

$[\text{Rh}(\text{nbd})_2]\text{BF}_4$  (14 mg, 0.0375 mmol) and dppe (15 mg, 0.0375 mmol) were dissolved in propylene carbonate (2.5 mL) and stirred at room temperature for 10 minutes. 3-(methylthio)propionaldehyde (75  $\mu\text{L}$ , 0.75 mmol) then phenylacetylene (90  $\mu\text{L}$ , 0.83 mmol) were added and the reaction heated at 70 °C for 1 hour. The reaction mixture was loaded directly onto silica and eluted with 30%  $\text{Et}_2\text{O}$ /petrol to furnish the pure product as a yellow oil (139 mg, 90%).  $\nu_{\text{max}}$  (film)/ $\text{cm}^{-1}$  2917, 1688, 1661, 1612;  $^1\text{H}$  NMR (400 MHz,  $\text{CDCl}_3$ )  $\delta_{\text{H}}$  7.69-7.49 (m, 3H [including d,  $J = 16.3$  Hz, 1H]), 7.47-7.35 (m, 3H), 6.75 (d,  $J = 16.3$  Hz, 1H), 3.05-2.92 (m, 2H), 2.91-2.77 (m, 2H), 2.15 (s, 3H);  $^{13}\text{C}$  NMR (101 MHz,  $\text{CDCl}_3$ )  $\delta_{\text{C}}$  198.4, 143.1, 134.3, 130.7, 129.0, 128.4, 125.9, 40.6, 28.4, 15.9; HRMS (ESI) found  $m/z$  229.0658  $[\text{M}+\text{Na}]^+$ ,  $\text{C}_{12}\text{H}_{14}\text{NaOS}$  requires 229.0660.

### (*E*)-1-(methylthio)non-4-en-3-one

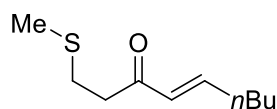

Prepared according to general procedure A to furnish the product as a yellow oil (127 mg, 91%).  $^1\text{H}$  NMR (200 MHz,  $\text{CDCl}_3$ )  $\delta_{\text{H}}$  6.85 (dt,  $J = 15.9, 6.9$  Hz, 1H), 6.08 (dt,  $J = 15.9, 1.5$  Hz, 1H), 2.92-2.66 (m, 4H), 2.29-2.13 (m, 2H), 2.10 (s, 3H), 1.56-1.19 (m, 4H), 0.91 (t,  $J = 6.9$  Hz, 3H);  $^{13}\text{C}$  NMR (101 MHz,  $\text{CDCl}_3$ )  $\delta_{\text{C}}$  198.6, 148.2, 130.1, 39.7, 32.2, 30.1, 28.3, 22.2, 15.8, 13.8;  $m/z$  (ESI) 187 (25%,  $[\text{M}+\text{H}]^+$ ). Data consistent with the literature.<sup>2</sup>

### (*E*)-1-(methylthio)undec-4-en-3-one

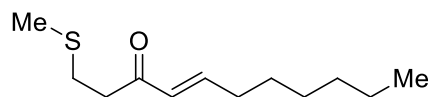

Prepared according to general procedure A to furnish the product as a yellow oil (146 mg, 91%) as a mixture of linear and branched isomers (84:16 l:b).  $\nu_{\text{max}}$  (film)/ $\text{cm}^{-1}$  2956, 2927, 2857, 1696, 1673, 1629;  $^1\text{H}$  NMR (400 MHz,  $\text{CDCl}_3$ )  $\delta_{\text{H}}$  6.81 (dt,  $J = 15.9, 6.9$  Hz, 1H), 6.05 (d,  $J = 15.9$  Hz, 1H), 2.82-2.78 (m, 2H), 2.73-2.69 (m, 2H), 2.21-2.14 (m, 2H), 2.07 (s, 3H), 1.45-1.38 (m, 2H), 1.31-1.28 (m, 6H), 0.85-0.81 (m, 3H);  $^{13}\text{C}$  NMR (101 MHz,  $\text{CDCl}_3$ )  $\delta_{\text{C}}$  198.5, 148.2, 130.0, 124.0, 39.7, 32.5, 31.6,

28.3, 28.0, 22.5, 15.8, 14.0; HRMS (ESI) found  $m/z$  237.1281  $[M+Na]^+$ ,  $C_{12}H_{22}NaOS$  requires 237.1284.

**(E)-1-(methylthio)-7-phenylhept-4-en-3-one**

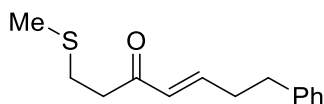

Prepared according to general procedure A to furnish the product as a pale yellow oil (146 mg, 83%) as a mixture of linear and branched isomers (80:20 l:b).  $\nu_{max}$  (film)/ $cm^{-1}$  2917, 1671, 1628;  $^1H$  NMR (400 MHz,  $CDCl_3$ )  $\delta_H$  7.32-7.17 (m, 5H), 6.88 (dt,  $J = 15.9, 6.8$  Hz, 1H), 6.13 (d,  $J = 15.9$  Hz, 1H), 2.85-2.72 (m, 6H), 2.55 (q,  $J = 7.4$  Hz, 2H), 2.11 (s, 3H);  $^{13}C$  NMR (101 MHz,  $CDCl_3$ )  $\delta_C$  198.4, 146.7, 140.6, 130.6, 128.6, 128.4, 126.3, 39.9, 34.4, 34.2, 28.3, 15.8; HRMS (ESI) found  $m/z$  257.0972  $[M+Na]^+$ ,  $C_{14}H_{18}NaOS$  requires 257.0971.

**(E)-8-chloro-1-(methylthio)oct-4-en-3-one**

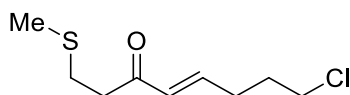

Prepared according to general procedure A to furnish the product as a pale yellow oil (85 mg, 66%).  $^1H$  NMR (400 MHz,  $CDCl_3$ )  $\delta_H$  6.80 (dt,  $J = 15.8, 6.9$  Hz, 1H), 6.13 (d,  $J = 15.8$  Hz, 1H), 3.52 (t,  $J = 6.4$  Hz, 2H), 2.83-2.80 (m, 2H), 2.74-2.71 (m, 2H), 2.40-2.34 (m, 2H), 2.08 (s, 3H), 1.91 (quin,  $J = 7.1$  Hz);  $^{13}C$  NMR (101 MHz,  $CDCl_3$ )  $\delta_C$  198.2, 145.6, 130.8, 44.0, 40.0, 30.7, 29.5, 28.2, 15.8;  $m/z$  (FI) 206 (100%,  $[M]^+$ ). Data consistent with the literature.<sup>2</sup>

**(E)-5-(Ethylthio)-1,5-diphenylpent-1-en-3-one**

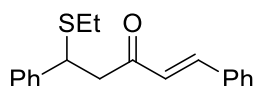

Prepared according to general procedure A to furnish the product as a white solid (196 mg, 86%). m.p. 100-102 °C;  $\nu_{max}$  (film)/ $cm^{-1}$  2970, 1648, 699;  $^1H$  NMR (400 MHz,  $CDCl_3$ )  $\delta_H$  7.54-7.50 (m, 3H), 7.43-7.39 (m, 5H), 7.34-7.30 (m, 2H), 7.25-7.21 (m, 1H), 6.68 (d,  $J = 16.1$  Hz, 1H), 4.50 (t,  $J = 7.2$  Hz, 1H), 3.23 (d,  $J = 7.2$  Hz, 2H), 2.43-2.29 (m, 2H), 1.18 (t,  $J = 7.6$  Hz, 3H);  $^{13}C$  NMR (100 MHz,  $CDCl_3$ )  $\delta_C$  196.9, 143.2, 142.1, 134.3, 130.6 (2×CH), 128.9 (2×CH), 128.5, 128.3 (2×CH), 127.8 (2×CH), 127.2, 126.1, 47.4, 44.2, 25.4 and 14.3. HRMS (FI) found  $m/z$  296.1231  $[M]^+$ ,  $C_{19}H_{20}OS$  requires 296.1235. Data consistent with the literature.<sup>3</sup>

**(E)-1-Cyclopropyl-5-(ethylthio)-5-phenylpent-1-en-3-one**

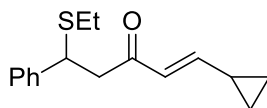

Prepared according to general procedure A to furnish the product as a colourless oil (174 mg, 90%).  $\nu_{\max}$  (film)/ $\text{cm}^{-1}$  3027, 3006, 2926, 2870, 1949, 1876, 1805, 1713, 1667, 1616, 950, 937, 699;  $^1\text{H}$  NMR (400 MHz,  $\text{CDCl}_3$ )  $\delta_{\text{H}}$  7.36-7.09 (m, 5H), 6.19 (dd,  $J = 15.6, 9.6$  Hz, 1H), 6.08 (d,  $J = 15.6$  Hz, 1H), 4.34 (t,  $J = 7.2$ , 1H), 2.96 (d,  $J = 7.2$  Hz, 2H), 2.33-2.17 (m, 2H), 1.51-1.39 (m, 1H), 1.08 (t,  $J = 7.4$  Hz, 3H), 0.95-0.84 (m, 2H), 0.59-0.51 (m, 2H).  $^{13}\text{C}$  NMR (100 MHz,  $\text{CDCl}_3$ )  $\delta_{\text{C}}$  196.1, 153.5, 142.2, 128.4 (2 $\times$ CH<sub>2</sub>), 127.7 (2 $\times$ CH<sub>2</sub>), 127.2, 127.1, 46.8, 44.1, 25.4, 14.8, 14.3, 9.1 (2 $\times$ CH<sub>2</sub>). HRMS (FI) found  $m/z$  260.1242 [ $\text{M}$ ]<sup>+</sup>, C<sub>16</sub>H<sub>20</sub>OS requires 260.1235. Data consistent with the literature.<sup>3</sup>

#### (E)-1-(Ethylthio)-1,7-diphenylhept-4-en-3-one

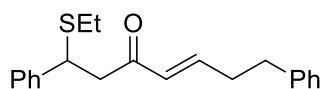

Prepared according to general procedure A to furnish the product as a colourless oil (210 mg, 87%).  $\nu_{\max}$ (film)/ $\text{cm}^{-1}$  3061, 3027, 2967, 2926, 2869, 1693, 1677, 1453, 748;  $^1\text{H}$  NMR (400 MHz,  $\text{CDCl}_3$ ),  $\delta_{\text{H}}$  7.37-6.96 (m, 10H), 6.74 (dt,  $J = 15.8, 6.8$  Hz, 1H), 5.98 (d,  $J = 15.8$ Hz, 1H), 4.33 (t,  $J = 7.2$ , 1H), 2.99 (d,  $J = 7.2$  Hz, 2H), 2.67 (t,  $J = 7.7$  Hz, 2H), 2.42 (q,  $J = 7.4$  Hz, 2H), 2.30-2.18 (m, 2H), 1.08 (t,  $J = 7.4$  Hz, 3H);  $^{13}\text{C}$  NMR (100 MHz,  $\text{CDCl}_3$ ),  $\delta_{\text{C}}$  196.9, 146.89, 142.1, 140.6, 130.8, 128.5 (2 $\times$ CH), 128.4 (2 $\times$ CH), 128.3 (2 $\times$ CH), 127.7 (2 $\times$ CH), 127.1, 126.2, 46.6, 44.1, 34.3, 34.1, 25.4, 14.3; HRMS (ESI) found  $m/z$  325.1621 [ $\text{M}+\text{H}$ ]<sup>+</sup>, C<sub>21</sub>H<sub>25</sub>OS requires 325.1621.

#### (E)-1-(ethylthio)-1-phenylundec-4-en-3-one

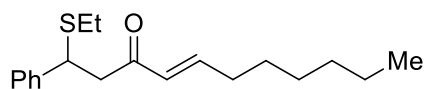

Prepared according to general procedure A to furnish the product as a colourless oil (207 mg, 95%).  $\nu_{\max}$ (film)/ $\text{cm}^{-1}$  2928, 2870, 1674, 1627, 1409, 699;  $^1\text{H}$  NMR (400 MHz,  $\text{CDCl}_3$ )  $\delta_{\text{H}}$  7.40-7.35 (m, 2H), 7.30 (t,  $J = 7.7$ , 2H), 7.25-7.19 (m, 1H), 6.80 (dt,  $J = 15.8, 6.9$  Hz, 1H), 6.04 (d,  $J = 15.8$  Hz, 1H), 4.43 (t,  $J = 7.2$  Hz, 1H), 3.09 (d,  $J = 7.2$  Hz, 2H), 2.33 (t,  $J = 7.3$ , 2H), 2.24-2.11 (m, 2H), 1.48-1.36 (m, 2H), 1.34-1.22 (m, 6H), 1.16 (t,  $J = 7.3$  Hz, 3H), 0.95-0.82 (m, 3H);  $^{13}\text{C}$  NMR (100 MHz,  $\text{CDCl}_3$ )  $\delta_{\text{C}}$  197.1, 148.5, 142.2, 130.3, 128.43 (2 $\times$ CH), 127.7 (2 $\times$ CH), 127.1, 46.5, 44.1, 32.5, 31.5, 28.8, 27.9, 25.4, 22.5, 14.3, 14.0;  $m/z$  (ESI) 327 (100%, [ $\text{M}+\text{Na}$ ]<sup>+</sup>), 305 (45%, [ $\text{M}+\text{H}$ ]<sup>+</sup>); HRMS (ESI) found  $m/z$  305.1934 [ $\text{M}+\text{H}$ ]<sup>+</sup>, C<sub>19</sub>H<sub>29</sub>OS requires 305.1934.

**(E)-1-(2-(methylthio)phenyl)-3-phenylprop-2-en-1-ol**

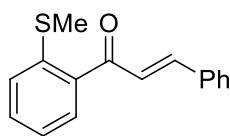

Prepared according to general procedure A to furnish the product as a yellow oil (160 mg, 84%) as a mixture of linear and branched isomers (11:1, l:b).  $\nu_{\max}(\text{film})/\text{cm}^{-1}$  3059, 2912, 1655, 1598, 1208, 750;  $^1\text{H NMR}$  (400 MHz,  $\text{CDCl}_3$ )  $\delta_{\text{H}}$  7.70 (dd,  $J = 1.3$  and  $7.7$  Hz, 1H), 7.64 (d,  $J = 15.9$ , 1H), 7.60-7.58 (m, 2H), 7.49-7.45 (m, 1H), 7.40-7.37 (m, 4H), 7.32 (d,  $J = 15.9$ , 1H), 7.26-7.22 (m, 1H), 2.45 (s, 3H);  $^{13}\text{C NMR}$  (101 MHz,  $\text{CDCl}_3$ )  $\delta_{\text{C}}$  192.9, 145.2, 140.5, 137.2, 134.8, 131.6, 130.6, 129.5, 129.0, 128.5, 126.3, 124.8, 124.2, 16.5; HRMS (ESI) found  $m/z$  277.0657  $[\text{M}+\text{Na}]^+$ ,  $\text{C}_{16}\text{H}_{14}\text{NaOS}$  requires 277.0658.

**(E)-1-(2-(methylthio)phenyl)non-2-en-1-one**

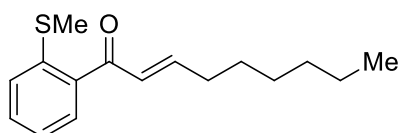

Prepared according to general procedure A to furnish the product as a yellow oil (169 mg, 86%).  $\nu_{\max}(\text{film})/\text{cm}^{-1}$  2955, 2926, 2856, 1661, 1615;  $^1\text{H NMR}$  (400 MHz,  $\text{CDCl}_3$ )  $\delta_{\text{H}}$  7.56 (d,  $J = 7.7$  Hz, 1H), 7.43-7.39 (m, 1H), 7.32 (d,  $J = 8.0$  Hz, 1H), 7.19-7.15 (m, 1H), 6.90-6.83 (m, 1H), 6.63 (d,  $J = 15.6$  Hz, 1H), 2.41 (s, 3H), 2.26 (app. q,  $J = 7.2$  Hz, 2H), 1.51-1.44 (m, 2H), 1.36-1.28 (m, 6H), 0.87 (t,  $J = 6.6$  Hz, 3H);  $^{13}\text{C NMR}$  (101 MHz,  $\text{CDCl}_3$ )  $\delta_{\text{C}}$  193.4, 151.1, 140.2, 137.1, 131.2, 129.3, 128.5, 126.1, 124.0, 32.8, 31.6, 28.9, 28.0, 22.5, 16.4, 14.1; HRMS (ESI) found  $m/z$  285.1280  $[\text{M}+\text{Na}]^+$ ,  $\text{C}_{16}\text{H}_{22}\text{NaOS}$  requires 285.1284.

**(E)-1-(2-(methylthio)phenyl)-5-phenylpent-2-en-1-one**

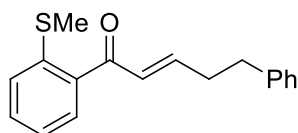

Prepared according to general procedure A to furnish the product as a yellow oil (149 mg, 70%).  $\nu_{\max}(\text{film})/\text{cm}^{-1}$  3060, 3026, 2920, 2856, 1661, 1615, 1300, 748;  $^1\text{H NMR}$  (400 MHz,  $\text{CDCl}_3$ )  $\delta_{\text{H}}$  7.52 (d,  $J = 7.7$  Hz, 1H), 7.46-7.41 (m, 1H), 7.36-7.29 (m, 3H), 7.24-7.16 (m, 4H), 6.91 (dt,  $J = 15.5$ , 6.8 Hz, 1H), 6.67 (dd,  $J = 15.5$ , 1.0 Hz, 1H), 2.83 (t,  $J = 7.7$  Hz, 2H), 2.61 (m, 2H), 3.45 (s, 3H);  $^{13}\text{C NMR}$  (101 MHz,  $\text{CDCl}_3$ )  $\delta_{\text{C}}$  193.2, 149.4, 140.8, 140.5, 136.8, 131.4, 129.5, 129.2, 128.5, 128.4,

126.2, 126.1, 124.0, 34.5, 34.4, 16.4; HRMS (ESI) found  $m/z$  305.0972  $[M+Na]^+$ ,  $C_{18}H_{18}NaOS$  requires 305.0971.

**(E)-6-chloro-1-(2-(methylthio)phenyl)hex-2-en-1-one**

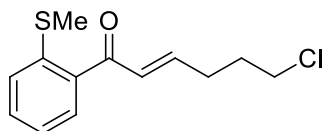

Prepared according to general procedure A to furnish the product as a yellow oil (126 mg, 66%).  $\nu_{\max}(\text{film})/\text{cm}^{-1}$  3059, 2957, 2020, 1662, 1616, 1298, 755, 740;  $^1\text{H NMR}$  (400 MHz,  $\text{CDCl}_3$ )  $\delta_{\text{H}}$  7.60 (d,  $J = 7.7$  Hz, 1H), 7.46-7.43 (m, 1H), 7.34 (d,  $J = 8.0$  Hz, 1H), 7.22-7.18 (m, 1H), 6.85 (dt,  $J = 15.5$ , 6.8 Hz, 1H), 6.72 (d,  $J = 15.6$  Hz, 1H), 3.57 (t,  $J = 6.4$  Hz, 2H), 2.50-2.44 (m, 2H), 2.44 (s, 3H), 2.01-1.94 (m, 2H);  $^{13}\text{C NMR}$  (101 MHz,  $\text{CDCl}_3$ )  $\delta_{\text{C}}$  192.8, 148.1, 140.6, 136.7, 131.5, 129.5, 129.4, 126.1, 124.0, 44.1, 30.7, 29.7 and 16.4; HRMS (ESI) found  $m/z$  277.0424  $[M+Na]^+$ ,  $C_{13}H_{15}ClNaOS$  requires 277.0424.

**(E)-1-(2-butyl-1,3-dithian-2-yl)-4-phenylbut-3-en-2-one**

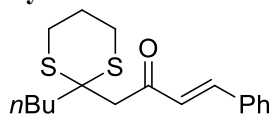

Prepared according to general procedure A to furnish the product as a bright yellow oil (175 mg, 73%).  $\nu_{\max}(\text{film})/\text{cm}^{-1}$  2954, 1717, 1605;  $^1\text{H NMR}$  (400 MHz,  $\text{CDCl}_3$ )  $\delta_{\text{H}}$  7.59-7.54 (m, 3H [incl. 7.57, d,  $J = 15.9$  Hz, 1H]), 7.39-7.38 (m, 3H), 6.85 (d,  $J = 15.9$  Hz, 1H), 3.25 (s, 2H), 2.95-2.82 (m, 2H), 2.16-2.09 (m, 2H), 2.08-1.90 (m, 2H), 1.57-1.50 (m, 2H), 1.41-1.31 (m, 2H), 0.94 (t,  $J = 7.3$  Hz, 3H);  $^{13}\text{C NMR}$  (101 MHz,  $\text{CDCl}_3$ )  $\delta_{\text{C}}$  195.8, 142.6, 134.5, 130.5, 129.0, 128.4, 126.7, 51.1, 48.6, 38.6, 26.5, 26.4, 25.0, 22.8, 14.0; HRMS (ESI) found  $m/z$  343.1159  $[M+Na]^+$ ,  $C_{18}H_{24}NaOS_2$  requires 343.1161.

**(E)-1-(2-butyl-1,3-dithian-2-yl)oct-3-en-2-one**

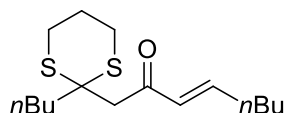

Prepared according to general procedure A to furnish the product as a bright yellow oil (175 mg, 73%).  $^1\text{H NMR}$  (300 MHz,  $\text{CDCl}_3$ )  $\delta_{\text{H}}$  6.80 (1H, dt,  $J = 15.6$ , 6.9 Hz), 6.12 (1H, dt,  $J = 15.6$ , 1.5 Hz), 3.06 (2H, s), 2.82-2.77 (4H, m), 2.15 (2H, tdd,  $J = 7.0$ , 6.9, 1.4 Hz), 2.05-1.85 (4H, m), 1.47-1.19 (8H, m), 0.86 (3H, t,  $J = 7.2$  Hz), 0.84 (3H, t,  $J = 7.1$  Hz);  $^{13}\text{C NMR}$  (101 MHz,  $\text{CDCl}_3$ )  $\delta_{\text{C}}$  196.4, 148.3, 131.4, 51.6, 47.8, 38.9, 32.6, 30.6, 26.9 (2 x  $\text{CH}_2$ ), 26.8, 25.5, 23.3, 22.7, 14.4, 14.2; HRMS (EI) found  $m/z$  301.1654  $[M+H]^+$ ,  $C_{16}H_{29}OS_2$  requires 301.1651. Data consistent with the literature.<sup>4</sup>

**(E)-1-(2-butyl-1,3-dithian-2-yl)dec-3-en-2-one**

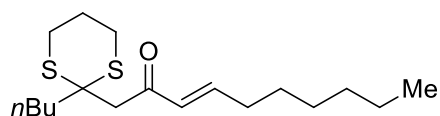

Prepared according to general procedure A to furnish the product as a yellow oil (204 mg, 83%).  $\nu_{\max}$  (film)/ $\text{cm}^{-1}$  2956, 2929, 2858, 1618, 1555;  $^1\text{H}$  NMR (400 MHz,  $\text{CDCl}_3$ )  $\delta_{\text{H}}$  6.87 (dt,  $J = 15.7, 6.9$  Hz, 1H), 6.20 (d,  $J = 16.9$  Hz, 1H), 3.14 (s, 2H), 2.89-2.85 (m, 4H), 2.25-2.20 (m, 2H), 2.11-2.07 (m, 2H), 2.01-1.95 (m, 2H), 1.52-1.46 (m, 4H), 1.38-1.26 (m, 8H), 0.96-0.87 (m, 6H);  $^{13}\text{C}$  NMR (101 MHz,  $\text{CDCl}_3$ )  $\delta_{\text{C}}$  196.0, 148.0, 130.9, 50.9, 47.3, 38.4, 32.4, 31.6, 28.8, 28.0, 26.5, 26.4, 25.0, 22.8, 22.5, 14.02, 13.97; HRMS (ESI) found  $m/z$  351.1785  $[\text{M}+\text{Na}]^+$ ,  $\text{C}_{18}\text{H}_{32}\text{NaOS}_2$  requires 351.1787.

**(E)-1-(2-butyl-1,3-dithian-2-yl)-6-phenylhex-3-en-2-one**

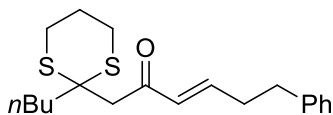

Prepared according to general procedure A to furnish the product as a yellow oil (196 mg, 75%).  $\nu_{\max}$  (film)/ $\text{cm}^{-1}$  2954, 2931, 2870, 1686, 1663, 1622;  $^1\text{H}$  NMR (400 MHz,  $\text{CDCl}_3$ )  $\delta_{\text{H}}$  7.32-7.28 (m, 2H), 7.23-7.18 (m, 3H), 6.89 (dt,  $J = 15.7, 7.1$  Hz, 1H), 6.21 (d,  $J = 15.7$  Hz, 1H), 3.12 (s, 2H), 2.87-2.78 (m, 6H), 2.59-2.52 (m, 2H), 2.09-2.05 (m, 2H), 2.01-1.92 (m, 2H), 1.52-1.45 (m, 2H), 1.38-1.29 (m, 2H), 0.93 (t,  $J = 7.6$  Hz, 3H);  $^{13}\text{C}$  NMR (101 MHz,  $\text{CDCl}_3$ )  $\delta_{\text{C}}$  195.8, 146.3, 140.7, 131.4, 128.5, 128.4, 126.2, 50.9, 47.4, 38.5, 34.3, 34.1, 26.4, 26.1, 25.0, 22.8, 14.0; HRMS (ESI) found  $m/z$  371.1469  $[\text{M}+\text{Na}]^+$ ,  $\text{C}_{20}\text{H}_{28}\text{NaOS}_2$  requires 371.1474.

**References**

1. M. Journet, D. Cai, L. M. DiMichele and R. D. Larsen, *Tetrahedron Lett.*, 1998, **39**, 6427-6428.
2. M. C. Willis, H. E. Randell-Sly, R. L. Woodward, S. J. McNally and G. S. Currie, *J. Org. Chem.*, 2006, **71**, 5291-5297.
3. C. González-Rodríguez, S. R. Parsons, A. L. Thompson and M. C. Willis, *Chem. Eur. J.*, 2010, **16**, 10950-10954.
4. M. C. Willis, H. E. Randell-Sly, R. L. Woodward and G. S. Currie, *Org. Lett.*, 2005, **7**, 2249-2251.



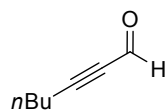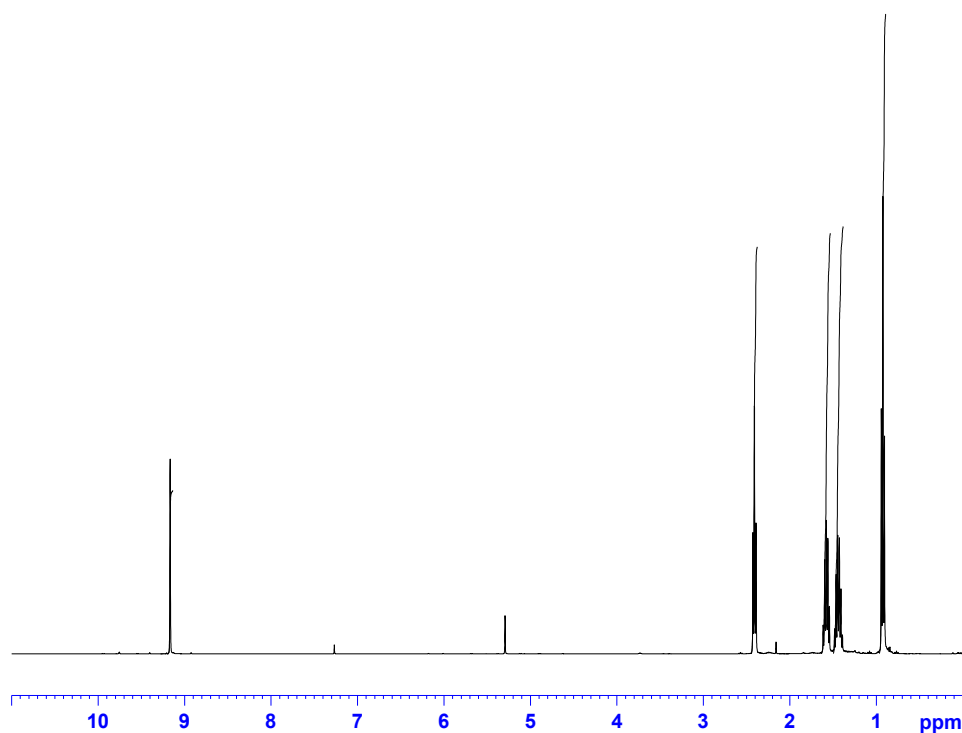

```
NAME      Aug06-2010-40
EXPNO     1
PROCNO    1
Date_     20100806
Time_     12.51
INSTRUM   av400
PROBHD    5 mm QNP 1H/13
PULPROG   zg60
TD         65536
SOLVENT   CDCl3
NS         16
DS         2
SWH        8278.146 Hz
FIDRES     0.126314 Hz
AQ         3.9584243 sec
RG         40.3
DW         60.400 usec
DE         7.50 usec
TE         300.0 K
D1         1.0000000 sec
```

```
===== CHANNEL f1 =====
NUC1      1H
P1        9.00 usec
PL1       0.00 dB
SFO1      400.2024714 MHz
SI        32768
SF        400.2000028 MHz
WDW       EM
SSB       0
LB        0.30 Hz
GB        0
PC        1.00
```

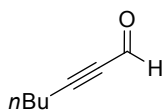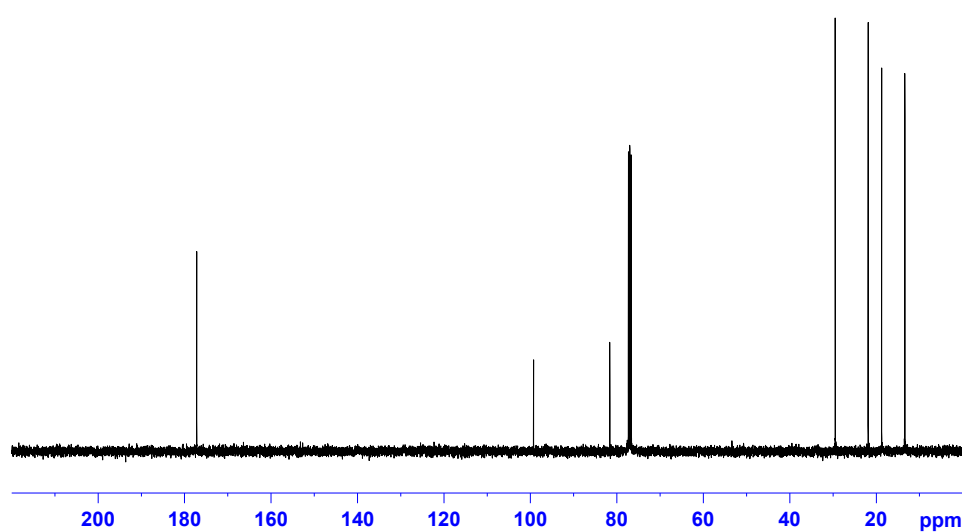

```
NAME      Aug06-2010-40
EXPNO     2
PROCNO    1
Date_     20100806
Time_     12.58
INSTRUM   av400
PROBHD    5 mm QNP 1H/13
PULPROG   zgpg30
TD         32768
SOLVENT   CDCl3
NS         256
DS         4
SWH        26178.010 Hz
FIDRES     0.798889 Hz
AQ         0.6259188 sec
RG         32768
DW         19.100 usec
DE         7.50 usec
TE         300.0 K
D1         1.0000000 sec
D11        0.03000000 sec
TD0        1
```

```
===== CHANNEL f1 =====
NUC1      13C
P1        9.50 usec
PL1       0.00 dB
SFO1      100.6403931 MHz
```

```
===== CHANNEL f2 =====
CFDPRG2   waltz16
NUC2      1H
PCPD2     80.00 usec
PL2       0.00 dB
PL12      19.00 dB
PL13      25.00 dB
SFO2      400.2016008 MHz
SI        32768
SF        100.6303718 MHz
WDW       EM
SSB       0
LB        1.00 Hz
GB        0
PC        1.40
```

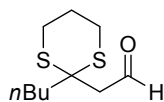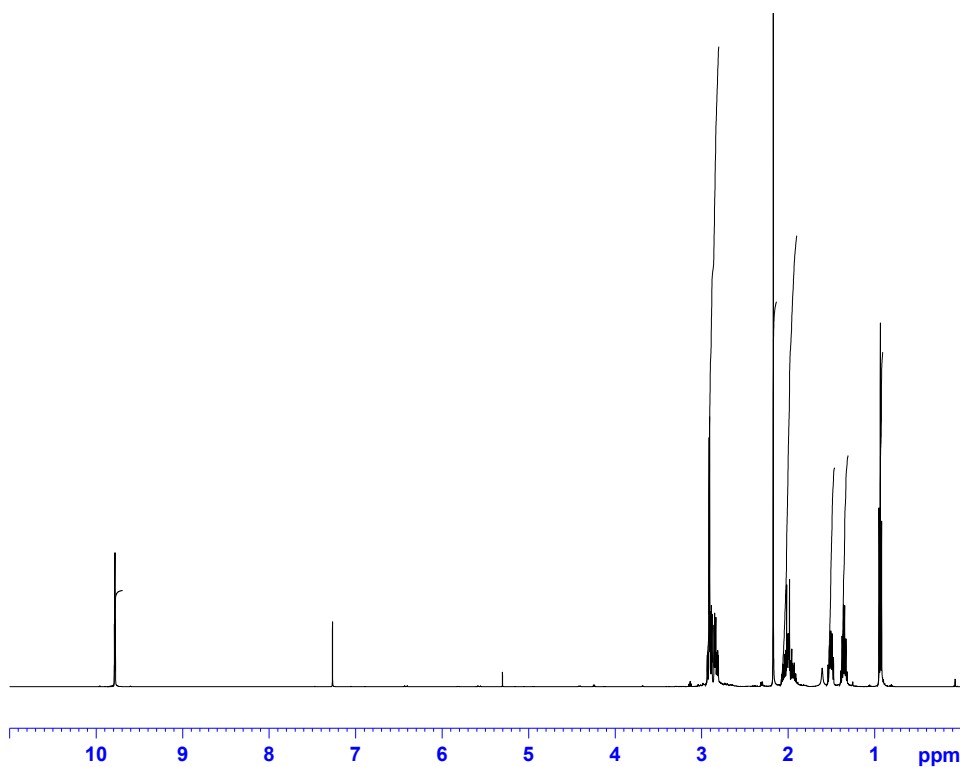

```

NAME      p112460811
EXPNO     1
PROCNO    1
Date_     20101109
Time      7.46
INSTRUM   avc500
PROBHD    5 mm CPDUL 13C
PULPROG   zg30
TD         65536
SOLVENT   CDCl3
NS         16
DS         2
SWH       10330.578 Hz
FIDRES    0.157632 Hz
AQ         3.1719923 sec
RG         4
DW         48.400 usec
DE         6.00 usec
TE         298.0 K
D1         1.00000000 sec
TD0        1
    
```

```

===== CHANNEL f1 =====
NUC1      1H
P1         9.60 usec
PL1       -6.00 dB
PL1W      15.1999981 W
SFO1      500.3030896 MHz
SI         32768
SF         500.3000240 MHz
WDW        EM
SSB         0
LB          0.30 Hz
GB          0
PC          1.00
    
```

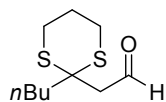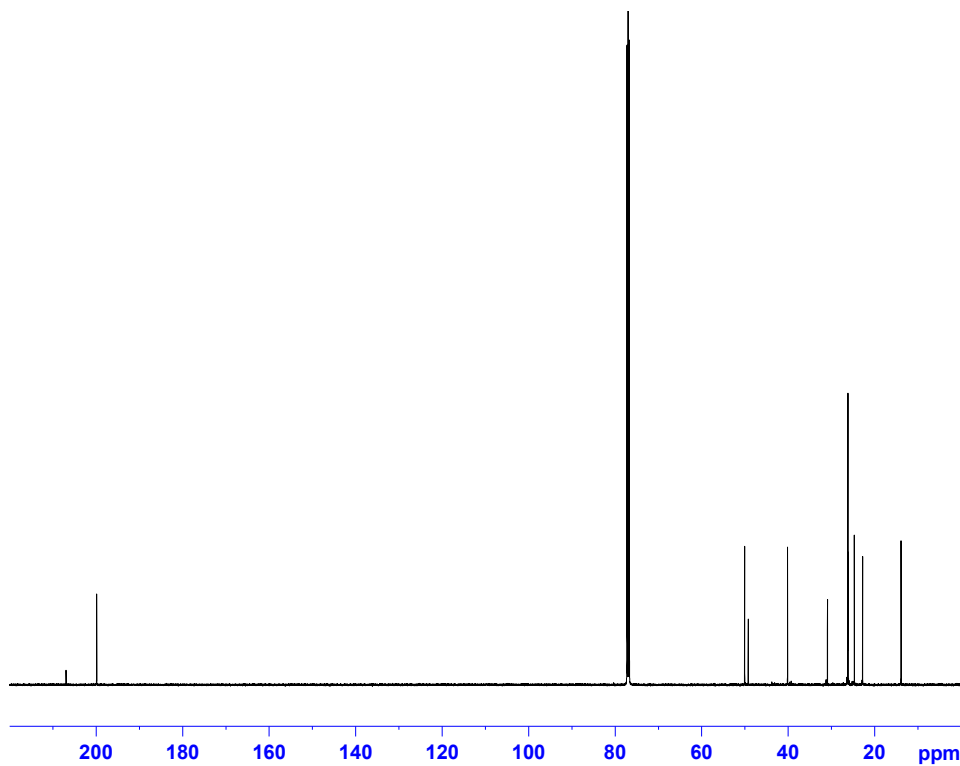

```

NAME      p112460811
EXPNO     2
PROCNO    1
Date_     20101109
Time      8.00
INSTRUM   avc500
PROBHD    5 mm CPDUL 13C
PULPROG   zgpg30
TD         65536
SOLVENT   CDCl3
NS         256
DS         2
SWH       31250.000 Hz
FIDRES    0.476837 Hz
AQ         1.0486259 sec
RG         1820
DW         16.000 usec
DE         20.00 usec
TE         298.1 K
D1         2.00000000 sec
D11        0.03000000 sec
TD0        1
    
```

```

===== CHANNEL f1 =====
NUC1      13C
P1         9.50 usec
PL1       -4.40 dB
PL1W      28.15752029 W
SFO1      125.8131151 MHz
    
```

```

===== CHANNEL f2 =====
CPDPRG2   waltz16
NUC2      1H
PCPD2     80.00 usec
PL2       -6.00 dB
PL12      12.42 dB
PL13      18.42 dB
PL2W      15.1999981 W
PL12W     0.21869738 W
PL13W     0.05493430 W
SFO2      500.3020012 MHz
SI         32768
SF         125.8005438 MHz
WDW        EM
SSB         0
LB          1.00 Hz
GB          0
PC          1.40
    
```

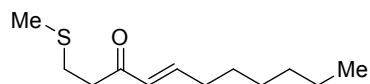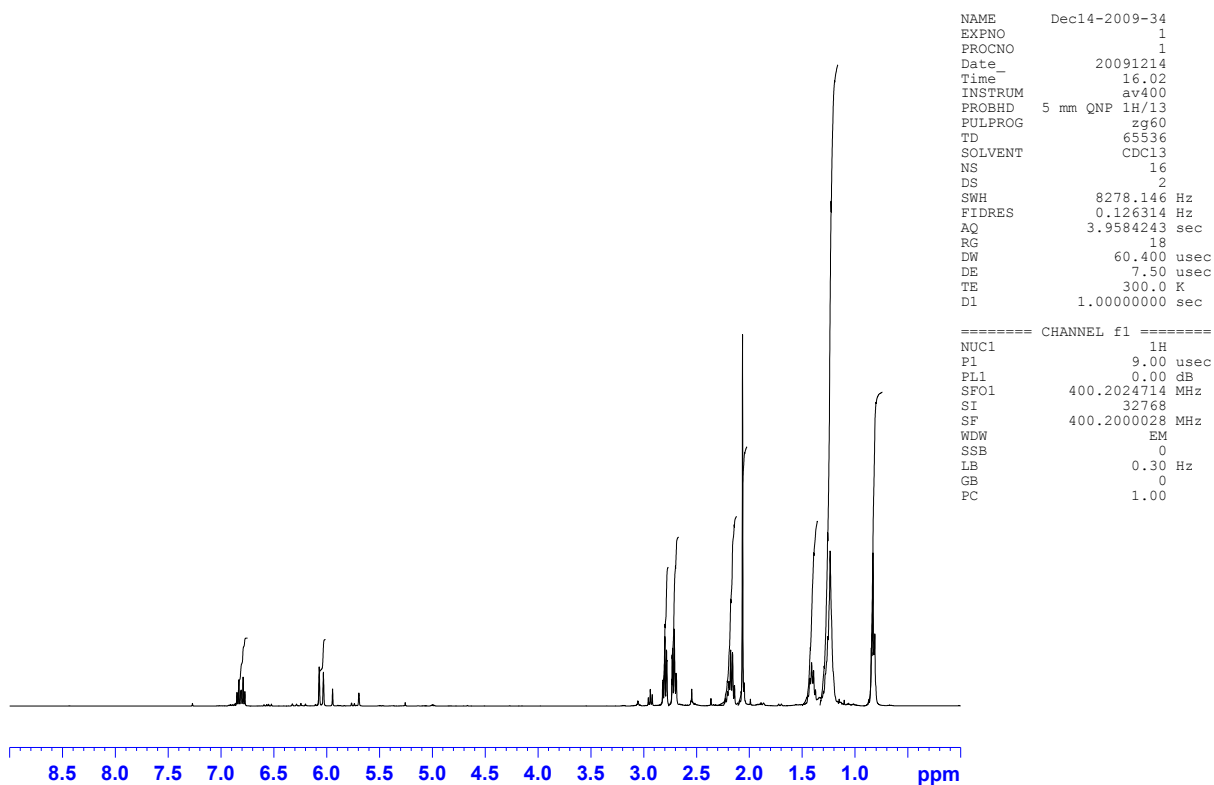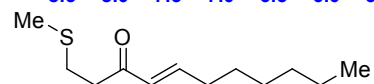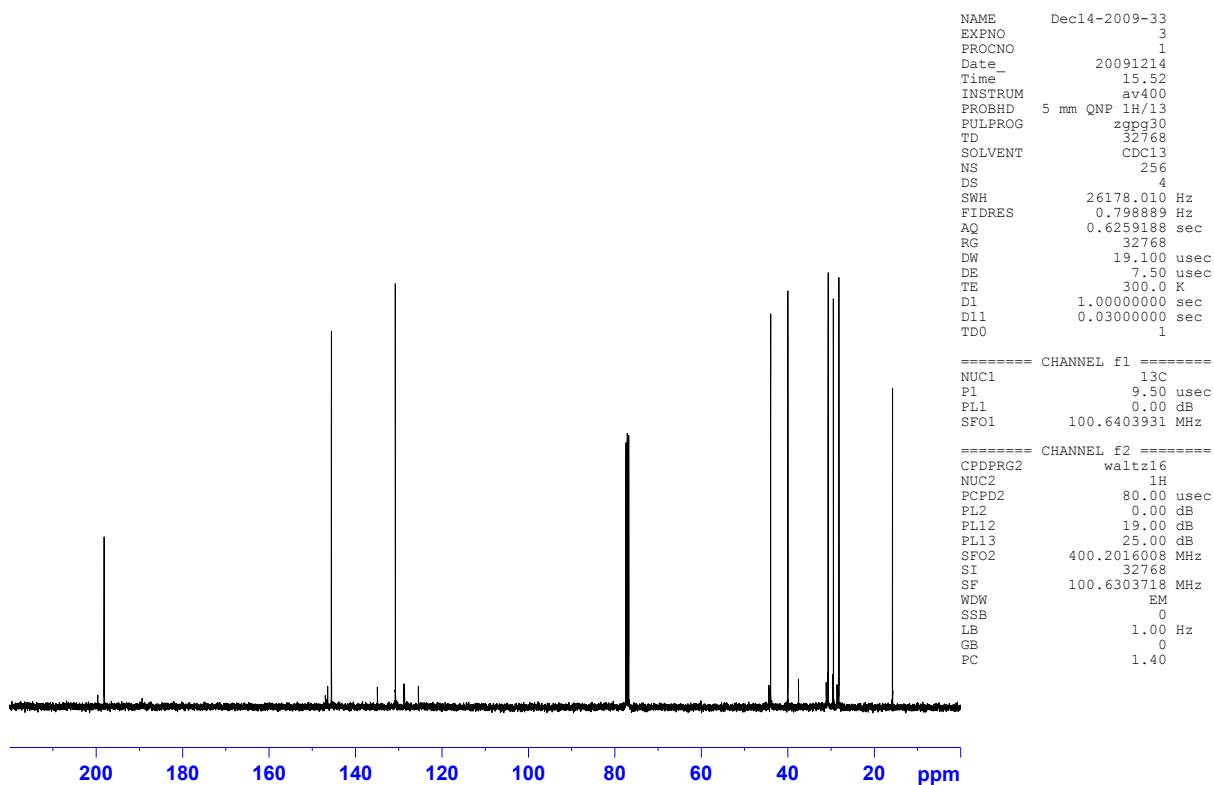

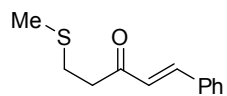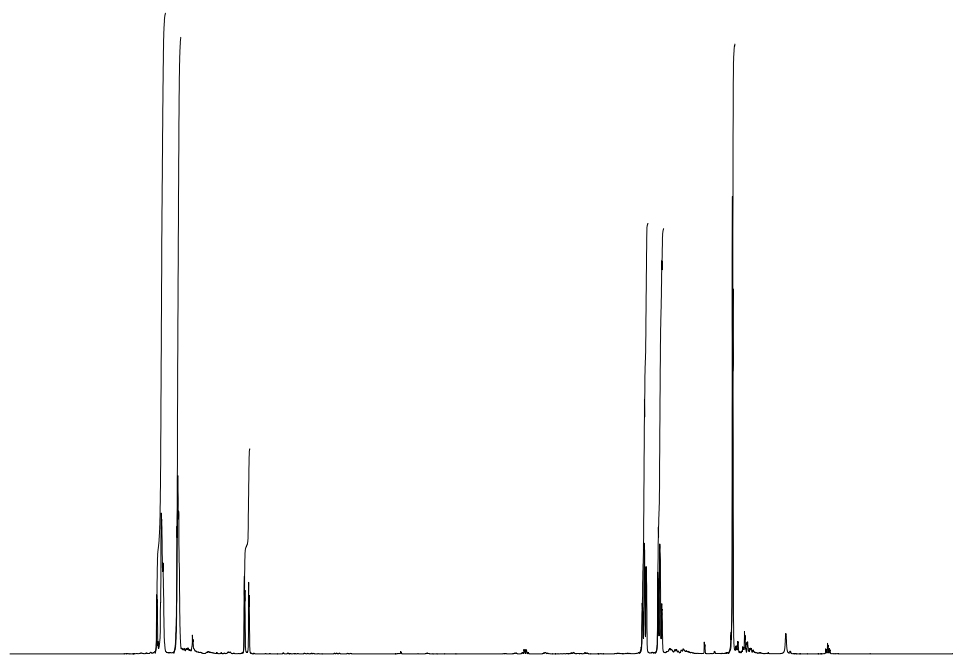

```
NAME      Nov08-2010-26
EXPNO     1
PROCNO    1
Date_     20101108
Time      17.30
INSTRUM   av400
PROBHD    5 mm QNP 1H/13
PULPROG   zg60
TD         65536
SOLVENT   CDCl3
NS         16
DS         2
SWH        8278.146 Hz
FIDRES     0.126314 Hz
AQ         3.9584243 sec
RG         90.5
DW         60.400 usec
DE         7.50 usec
TE         300.0 K
D1         1.0000000 sec
```

```
===== CHANNEL f1 =====
NUC1      1H
P1         9.00 usec
PL1        0.00 dB
SFO1      400.2024714 MHz
SI         32768
SF         400.2000028 MHz
WDW        EM
SSB        0
LB         0.30 Hz
GB         0
PC         1.00
```

8.5 8.0 7.5 7.0 6.5 6.0 5.5 5.0 4.5 4.0 3.5 3.0 2.5 2.0 1.5 1.0 ppm

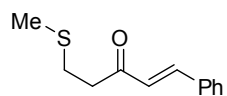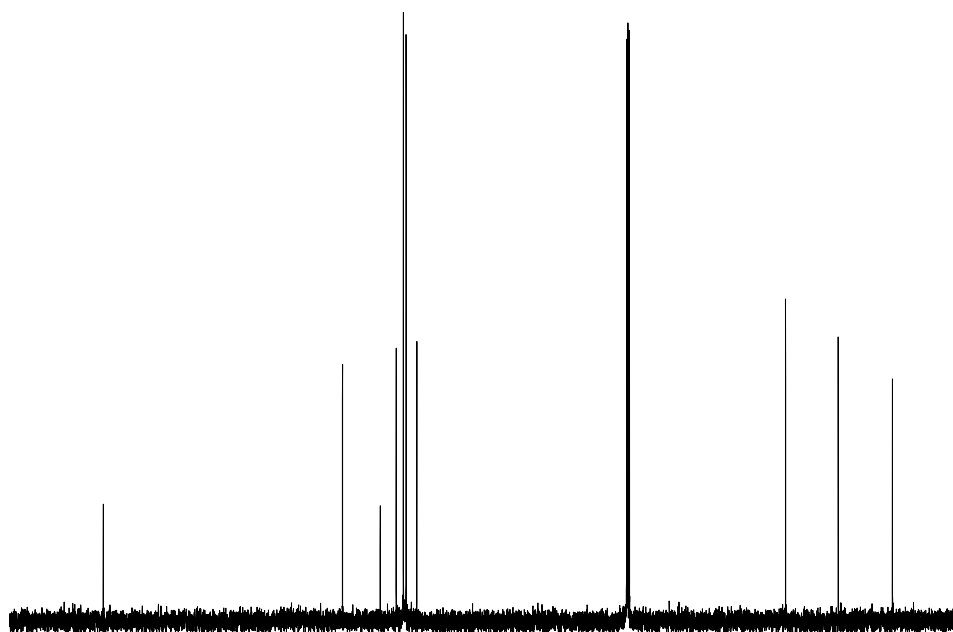

```
NAME      Nov08-2010-26
EXPNO     2
PROCNO    1
Date_     20101108
Time      17.38
INSTRUM   av400
PROBHD    5 mm QNP 1H/13
PULPROG   zgpg30
TD         32768
SOLVENT   CDCl3
NS         256
DS         4
SWH        26178.010 Hz
FIDRES     0.798889 Hz
AQ         0.6259188 sec
RG         32768
DW         19.100 usec
DE         7.50 usec
TE         300.0 K
D1         1.0000000 sec
D11        0.03000000 sec
TD0        1
```

```
===== CHANNEL f1 =====
NUC1      13C
P1         9.50 usec
PL1        0.00 dB
SFO1      100.6403931 MHz
```

```
===== CHANNEL f2 =====
CPDPRG2   waltz16
NUC2      1H
PCPD2     80.00 usec
PL2        0.00 dB
PL12       19.00 dB
PL13       25.00 dB
SFO2      400.2016008 MHz
SI         32768
SF         100.6303718 MHz
WDW        EM
SSB        0
LB         1.00 Hz
GB         0
PC         1.40
```

200 180 160 140 120 100 80 60 40 20 ppm

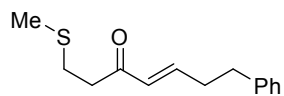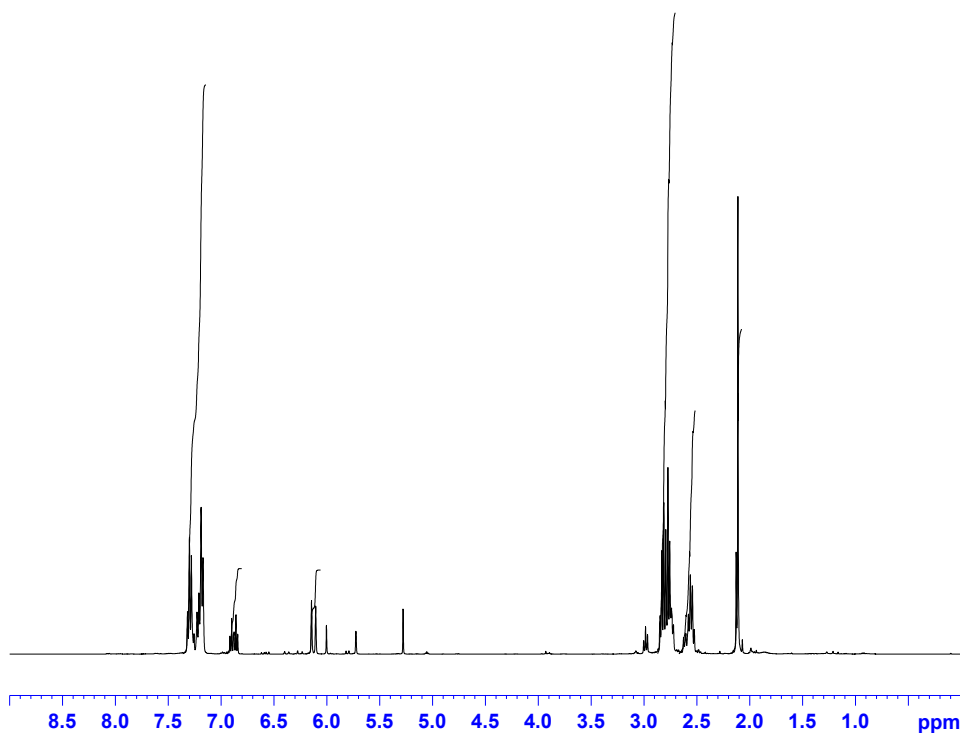

```
NAME      Dec14-2009-52
EXPNO     1
PROCNO    1
Date_     20091214
Time      23.13
INSTRUM   av400
PROBHD    5 mm QNP 1H/13
PULPROG   zg60
TD        65536
SOLVENT   CDCl3
NS        16
DS        2
SWH       8278.146 Hz
FIDRES    0.126314 Hz
AQ        3.9584243 sec
RG        25.4
DW        60.400 usec
DE        7.50 usec
TE        300.0 K
D1        1.0000000 sec
```

```
===== CHANNEL f1 =====
NUC1      1H
P1        9.00 usec
PL1       0.00 dB
SF01     400.2024714 MHz
SI        32768
SF        400.2000028 MHz
WDW       EM
SSB       0
LB        0.30 Hz
GB        0
PC        1.00
```

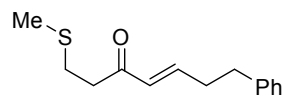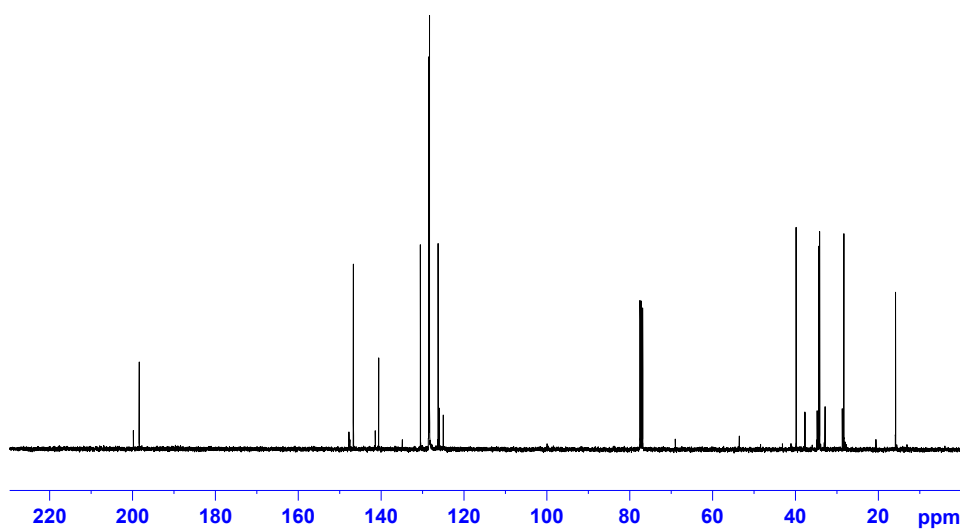

```
NAME      Dec14-2009-52
EXPNO     2
PROCNO    1
Date_     20091214
Time      23.21
INSTRUM   av400
PROBHD    5 mm QNP 1H/13
PULPROG   zgpg30
TD        32768
SOLVENT   CDCl3
NS        256
DS        4
SWH       26178.010 Hz
FIDRES    0.798889 Hz
AQ        0.6259188 sec
RG        32768
DW        19.100 usec
DE        7.50 usec
TE        300.0 K
D1        1.0000000 sec
D11       0.03000000 sec
TD0       1
```

```
===== CHANNEL f1 =====
NUC1      13C
P1        9.50 usec
PL1       0.00 dB
SF01     100.6403931 MHz

===== CHANNEL f2 =====
CPDPRG2   waltz16
NUC2      1H
PCPD2     80.00 usec
PL2       0.00 dB
PL12      19.00 dB
PL13      25.00 dB
SF02     400.2016008 MHz
SI        32768
SF        100.6303718 MHz
WDW       EM
SSB       0
LB        1.00 Hz
GB        0
PC        1.40
```

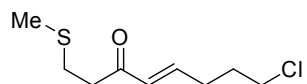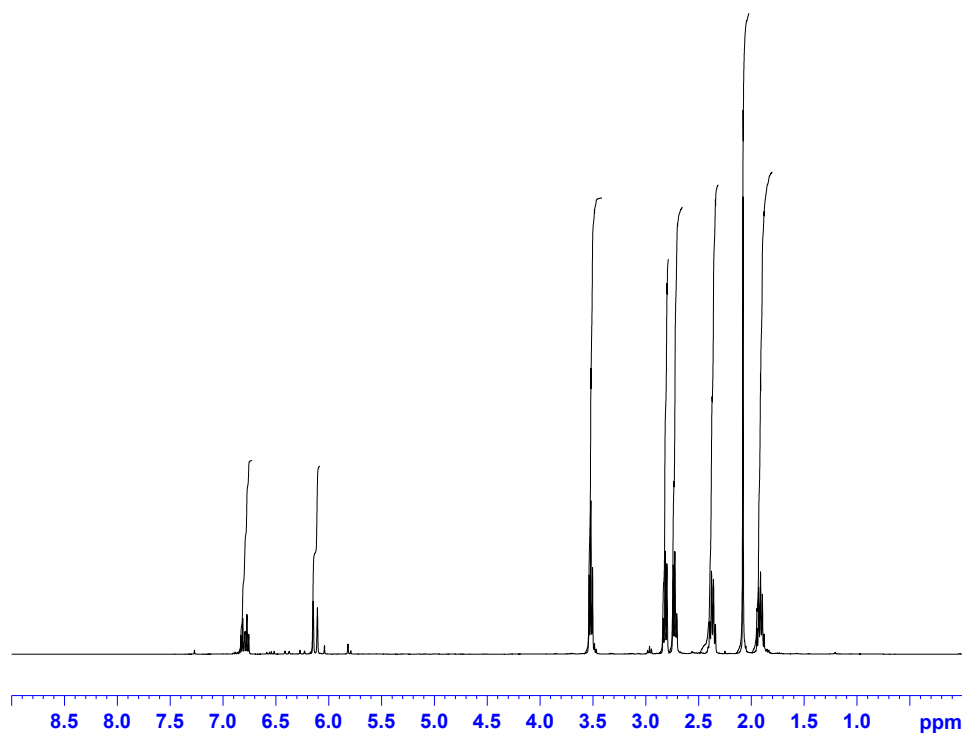

```
NAME      Dec14-2009-33
EXPNO     1
PROCNO    1
Date_     20091214
Time      15.44
INSTRUM   av400
PROBHD    5 mm QNP 1H/13
PULPROG   zg60
TD         65536
SOLVENT   CDCl3
NS         16
DS         2
SWH        8278.146 Hz
FIDRES     0.126314 Hz
AQ         3.9584243 sec
RG         32
DW         60.400 usec
DE         7.50 usec
TE         300.0 K
D1         1.0000000 sec
```

```
===== CHANNEL f1 =====
NUC1      1H
P1         9.00 usec
PL1        0.00 dB
SFO1      400.2024714 MHz
SI         32768
SF         400.2000028 MHz
WDW        EM
SSB        0
LB         0.30 Hz
GB         0
PC         1.00
```

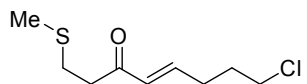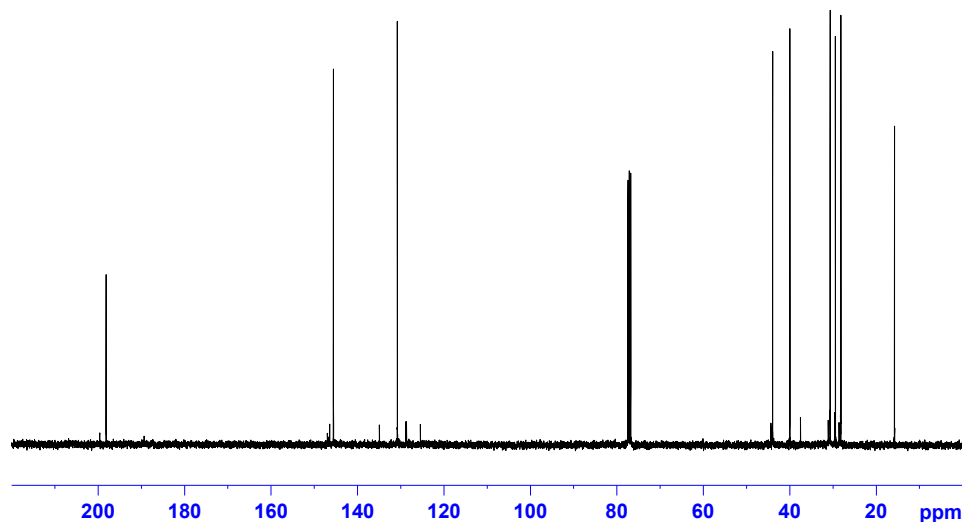

```
NAME      Dec14-2009-33
EXPNO     3
PROCNO    1
Date_     20091214
Time      15.52
INSTRUM   av400
PROBHD    5 mm QNP 1H/13
PULPROG   zgpg30
TD         32768
SOLVENT   CDCl3
NS         256
DS         4
SWH        26178.010 Hz
FIDRES     0.798889 Hz
AQ         0.6259188 sec
RG         32768
DW         19.100 usec
DE         7.50 usec
TE         300.0 K
D1         1.0000000 sec
D11        0.0300000 sec
TD0        1
```

```
===== CHANNEL f1 =====
NUC1      13C
P1         9.50 usec
PL1        0.00 dB
SFO1      100.6403931 MHz
```

```
===== CHANNEL f2 =====
CPDPRG2   waltz16
NUC2      1H
PCPD2     80.00 usec
PL2        0.00 dB
PL12      19.00 dB
PL13      25.00 dB
SFO2      400.2016008 MHz
SI         32768
SF         100.6303718 MHz
WDW        EM
SSB        0
LB         1.00 Hz
GB         0
PC         1.40
```

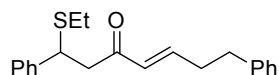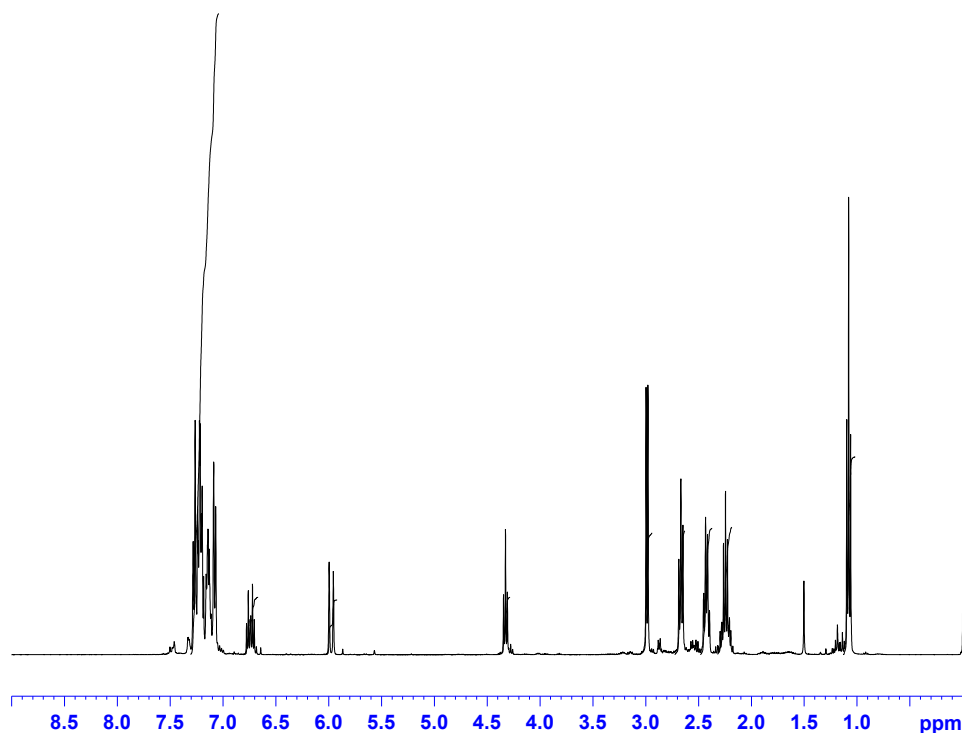

```
NAME          1c
EXPNO         1
PROCNO        1
Date_         20100417
Time_         9.16
INSTRUM       av400
PROBHD        5 mm QNP 1H/13
PULPROG       zg60
TD            65536
SOLVENT       CDCl3
NS            16
DS            2
SWH           8278.146 Hz
FIDRES        0.126314 Hz
AQ            3.9584243 sec
RG            128
DW            60.400 usec
DE            7.50 usec
TE            300.0 K
D1            1.0000000 sec
```

```
===== CHANNEL f1 =====
NUC1          1H
P1            9.00 usec
PL1           0.00 dB
SFO1          400.2024714 MHz
SI            32768
SF            400.2000378 MHz
WDW           EM
SSB           0
LB            0.30 Hz
GB            0
PC            1.00
```

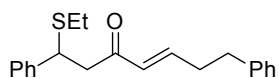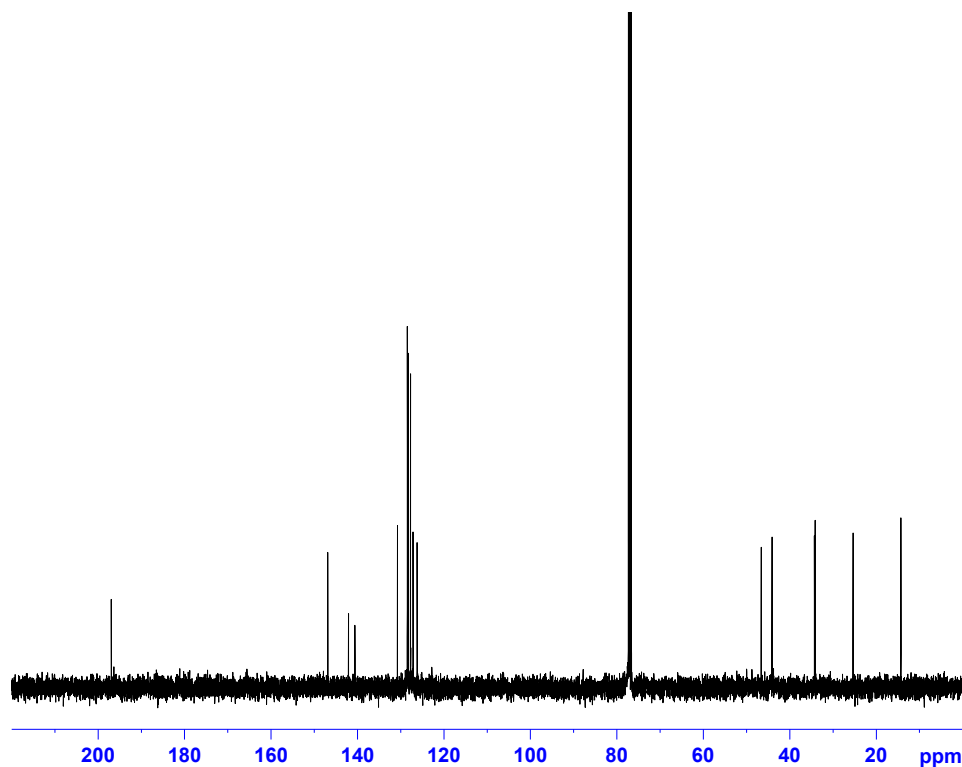

```
NAME          1c
EXPNO         2
PROCNO        1
Date_         20100417
Time_         9.24
INSTRUM       av400
PROBHD        5 mm QNP 1H/13
PULPROG       zgpg30
TD            32768
SOLVENT       CDCl3
NS            256
DS            4
SWH           26178.010 Hz
FIDRES        0.798889 Hz
AQ            0.6259188 sec
RG            32768
DW            19.100 usec
DE            7.50 usec
TE            300.0 K
D1            1.0000000 sec
D11           0.03000000 sec
TD0           1
```

```
===== CHANNEL f1 =====
NUC1          13C
P1            9.50 usec
PL1           0.00 dB
SFO1          100.6403931 MHz
```

```
===== CHANNEL f2 =====
CPDPRG2       waltz16
NUC2          1H
PCPD2         80.00 usec
PL2           0.00 dB
PL12          19.00 dB
PL13          25.00 dB
SFO2          400.2016008 MHz
SI            32768
SF            100.6303718 MHz
WDW           EM
SSB           0
LB            1.00 Hz
GB            0
PC            1.40
```

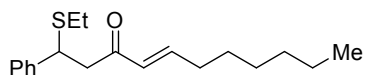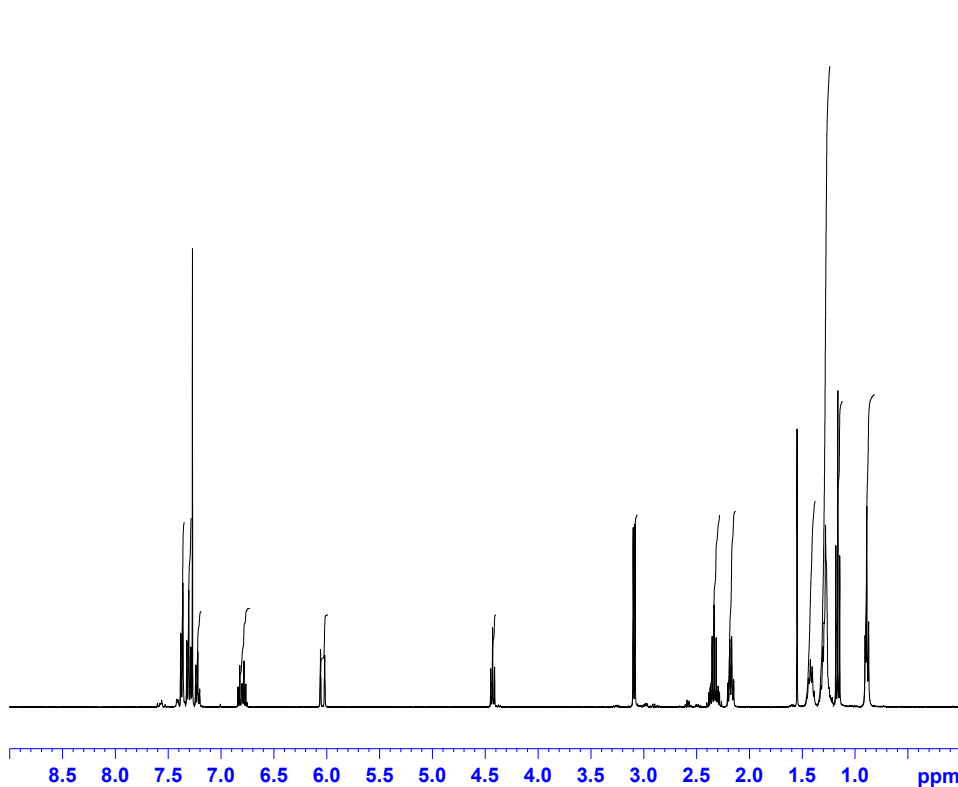

```
NAME      Sep18-2010-5
EXPNO     1
PROCNO    1
Date_     20100918
Time_     19.03
INSTRUM   av400
PROBHD    5 mm QNP 1H/13
PULPROG   zg60
TD        65536
SOLVENT   CDCl3
NS        16
DS        2
SWH       8278.146 Hz
FIDRES    0.126314 Hz
AQ        3.9584243 sec
RG        812.7
DW        60.400 usec
DE        7.50 usec
TE        300.0 K
D1        1.0000000 sec
```

```
===== CHANNEL f1 =====
NUC1      1H
P1        9.00 usec
PL1       0.00 dB
SFO1     400.2024714 MHz
SI        32768
SF        400.2000028 MHz
WDW       EM
SSB       0
LB        0.30 Hz
GB        0
PC        1.00
```

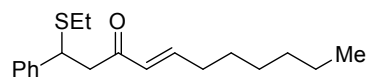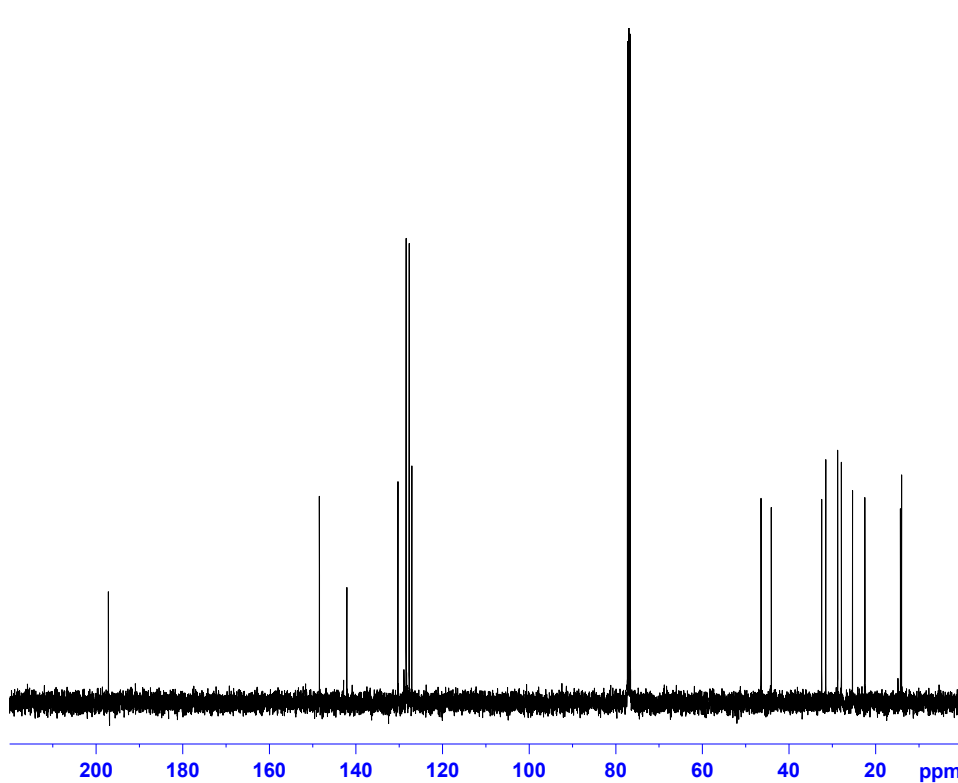

```
NAME      1d
EXPNO     2
PROCNO    1
Date_     20100918
Time_     19.18
INSTRUM   av400
PROBHD    5 mm QNP 1H/13
PULPROG   zgpg30
TD        32768
SOLVENT   CDCl3
NS        256
DS        4
SWH       26178.010 Hz
FIDRES    0.798889 Hz
AQ        0.6259188 sec
RG        32768
DW        19.100 usec
DE        7.50 usec
TE        300.0 K
D1        1.0000000 sec
D11       0.0300000 sec
TD0       1
```

```
===== CHANNEL f1 =====
NUC1      13C
P1        9.50 usec
PL1       0.00 dB
SFO1     100.6403931 MHz
```

```
===== CHANNEL f2 =====
CPDPRG2   waltz16
NUC2      1H
PCPD2     80.00 usec
PL2       0.00 dB
PL12     19.00 dB
PL13     25.00 dB
SFO2     400.2016008 MHz
SI        32768
SF        100.6303718 MHz
WDW       EM
SSB       0
LB        1.00 Hz
GB        0
PC        1.40
```



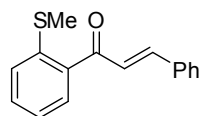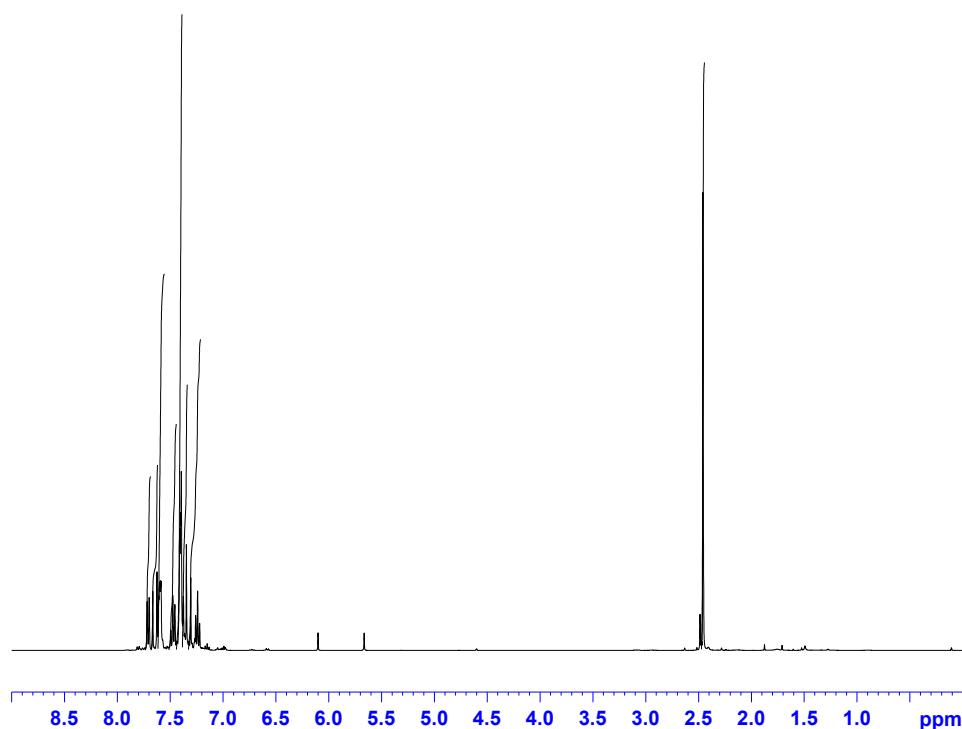

```

NAME      PY063021 DQX400
EXPNO     1
PROCNO    1
Date_     20100104
Time      21.03
INSTRUM   av400
PROBHD    5 mm QNP 1H/13
PULPROG   zg60
TD         65536
SOLVENT   CDCl3
NS         16
DS         2
SWH        8278.146 Hz
FIDRES     0.126314 Hz
AQ         3.9584243 sec
RG         40.3
DW         60.400 usec
DE         7.50 usec
TE         300.0 K
D1         1.0000000 sec
    
```

```

===== CHANNEL f1 =====
NUC1      1H
P1         9.00 usec
PL1        0.00 dB
SFO1      400.2024714 MHz
SI         32768
SF         400.2000028 MHz
WDW        EM
SSB         0
LB         0.30 Hz
GB         0
PC         1.00
    
```

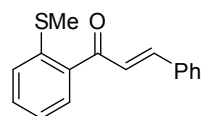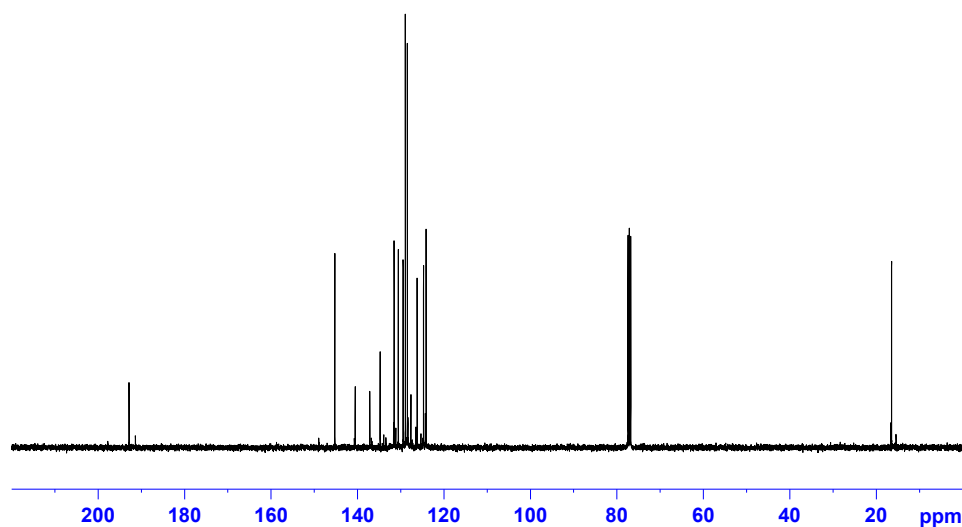

```

NAME      PY063021 DQX400
EXPNO     2
PROCNO    1
Date_     20100104
Time      21.11
INSTRUM   av400
PROBHD    5 mm QNP 1H/13
PULPROG   zgpg30
TD         32768
SOLVENT   CDCl3
NS         256
DS         4
SWH        26178.010 Hz
FIDRES     0.798889 Hz
AQ         0.6259188 sec
RG         32768
DW         19.100 usec
DE         7.50 usec
TE         300.0 K
D1         1.0000000 sec
D11        0.03000000 sec
TD0        1
    
```

```

===== CHANNEL f1 =====
NUC1      13C
P1         9.50 usec
PL1        0.00 dB
SFO1      100.6403931 MHz
    
```

```

===== CHANNEL f2 =====
CPDPRG2   waltz16
NUC2      1H
PCPD2     80.00 usec
PL2        0.00 dB
PL12       19.00 dB
PL13       25.00 dB
SFO2      400.2016008 MHz
SI         32768
SF         100.6303718 MHz
WDW        EM
SSB         0
LB         1.00 Hz
GB         0
PC         1.40
    
```

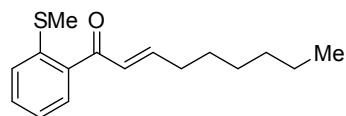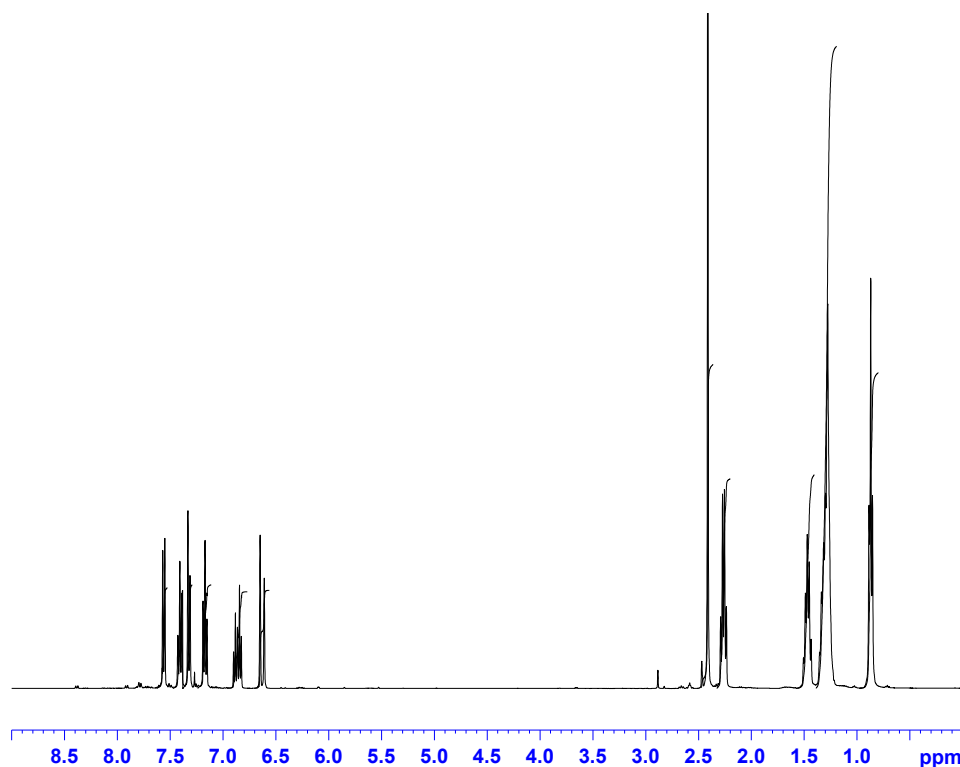

```
NAME Hex
EXPNO 1
PROCNO 1
Date_ 20100104
Time_ 21.16
INSTRUM av400
PROBHD 5 mm QNP 1H/13
PULPROG zg60
TD 65536
SOLVENT CDCl3
NS 16
DS 2
SWH 8278.146 Hz
FIDRES 0.126314 Hz
AQ 3.9584243 sec
RG 28.5
DW 60.400 usec
DE 7.50 usec
TE 300.0 K
D1 1.0000000 sec
```

```
===== CHANNEL f1 =====
NUC1 1H
P1 9.00 usec
PL1 0.00 dB
SFO1 400.2024714 MHz
SI 32768
SF 400.2000028 MHz
WDW EM
SSB 0
LB 0.30 Hz
GB 0
PC 1.00
```

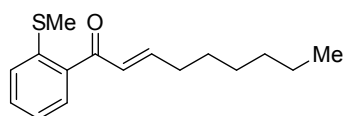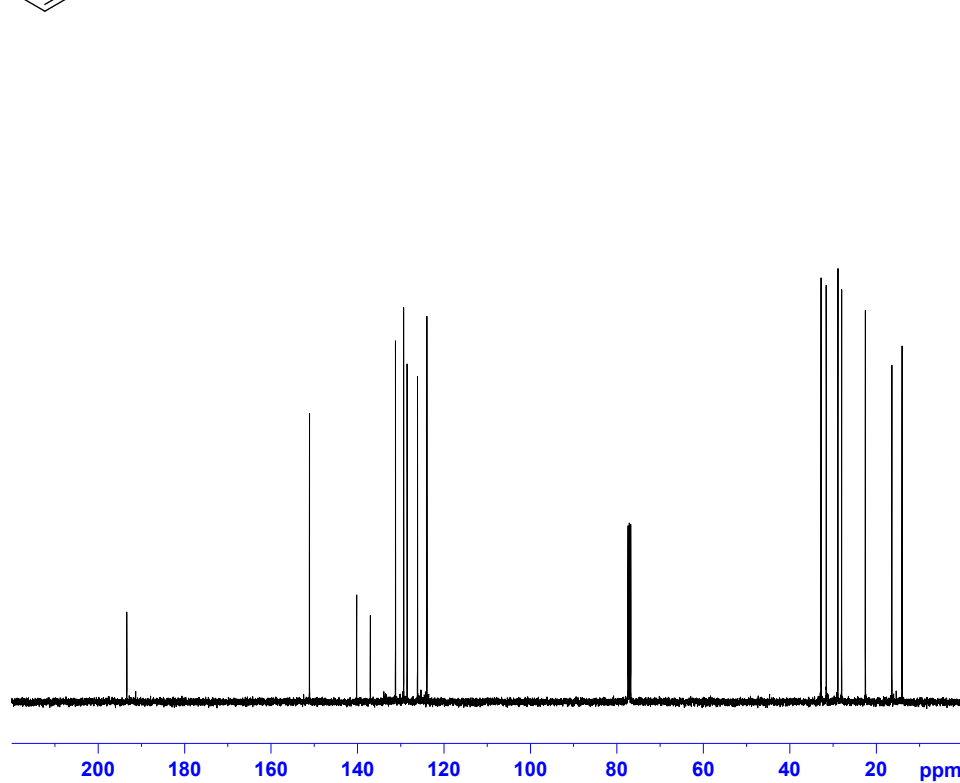

```
NAME Hex
EXPNO 2
PROCNO 1
Date_ 20100104
Time_ 21.24
INSTRUM av400
PROBHD 5 mm QNP 1H/13
PULPROG zgpg30
TD 32768
SOLVENT CDCl3
NS 256
DS 4
SWH 26178.010 Hz
FIDRES 0.798889 Hz
AQ 0.6259188 sec
RG 32768
DW 19.100 usec
DE 7.50 usec
TE 300.0 K
D1 1.0000000 sec
D11 0.03000000 sec
TD0 1
```

```
===== CHANNEL f1 =====
NUC1 13C
P1 9.50 usec
PL1 0.00 dB
SFO1 100.6403931 MHz
```

```
===== CHANNEL f2 =====
CPDPRG2 waltz16
NUC2 1H
PCPD2 80.00 usec
PL2 0.00 dB
PL12 19.00 dB
PL13 25.00 dB
SFO2 400.2016008 MHz
SI 32768
SF 100.6303718 MHz
WDW EM
SSB 0
LB 1.00 Hz
GB 0
PC 1.40
```

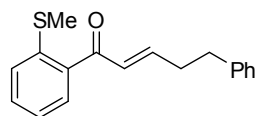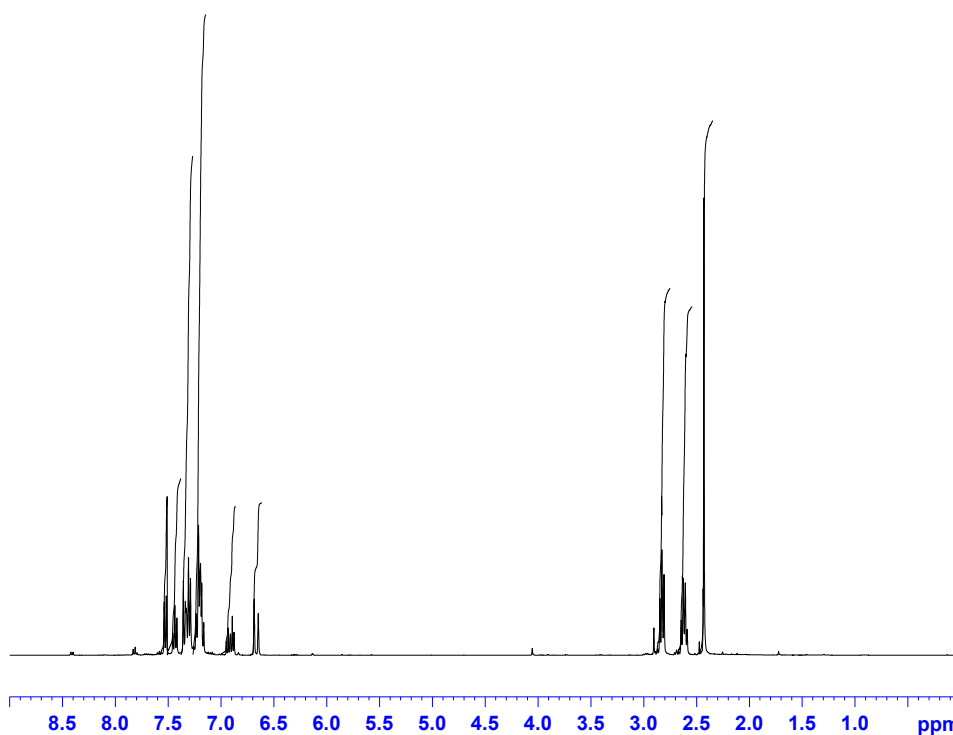

```

NAME          CH2CH2Ph
EXPNO         1
PROCNO        1
Date_         20100812
Time_         12.15
INSTRUM       av400
PROBHD        5 mm QNP 1H/13
PULPROG       zg60
TD            65536
SOLVENT       CDCl3
NS            16
DS            2
SWH           8278.146 Hz
FIDRES        0.126314 Hz
AQ            3.9584243 sec
RG            28.5
DW            60.400 usec
DE            7.50 usec
TE            300.0 K
D1            1.0000000 sec

===== CHANNEL f1 =====
NUC1          1H
P1            9.00 usec
PL1           0.00 dB
SFO1         400.2024714 MHz
SI           32768
SF           400.2000028 MHz
WDW           EM
SSB           0
LB            0.30 Hz
GB            0
PC            1.00
    
```

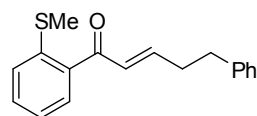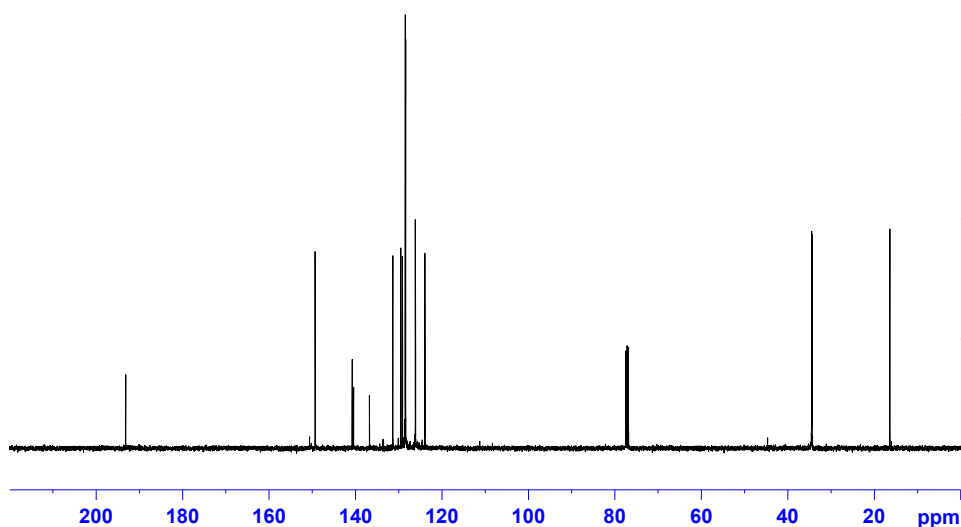

```

NAME          CH2CH2Ph
EXPNO         2
PROCNO        1
Date_         20100812
Time_         12.23
INSTRUM       av400
PROBHD        5 mm QNP 1H/13
PULPROG       zgpg30
TD            32768
SOLVENT       CDCl3
NS            256
DS            4
SWH           26178.010 Hz
FIDRES        0.798889 Hz
AQ            0.6259188 sec
RG            32768
DW            19.100 usec
DE            7.50 usec
TE            300.0 K
D1            1.0000000 sec
D11           0.03000000 sec
TD0           1

===== CHANNEL f1 =====
NUC1          13C
P1            9.50 usec
PL1           0.00 dB
SFO1         100.6403931 MHz

===== CHANNEL f2 =====
CPDPRG2       waltz16
NUC2          1H
PCPD2         80.00 usec
PL2           0.00 dB
PL12          19.00 dB
PL13          25.00 dB
SFO2         400.2016008 MHz
SI           32768
SF           100.6303718 MHz
WDW           EM
SSB           0
LB            1.00 Hz
GB            0
PC            1.40
    
```

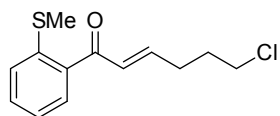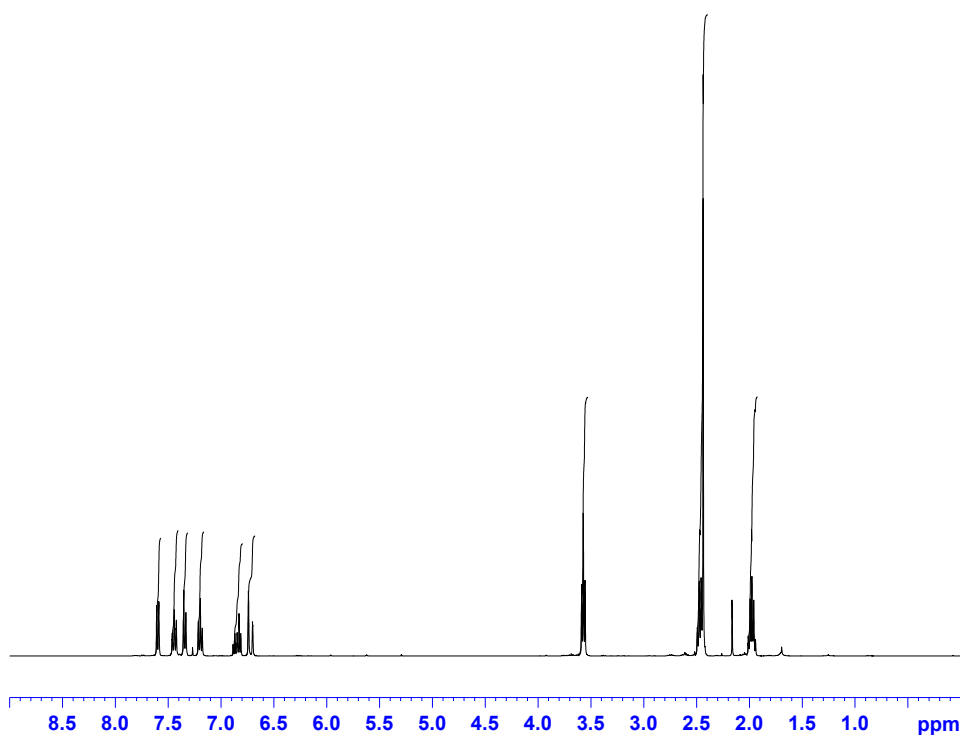

```
NAME          C12
EXPNO         1
PROCNO        1
Date_         20091110
Time_         10.49
INSTRUM       av400
PROBHD        5 mm QNP 1H/13
PULPROG       zg60
TD            65536
SOLVENT       CDCl3
NS            16
DS            2
SWH           8278.146 Hz
FIDRES        0.126314 Hz
AQ            3.9584243 sec
RG            90.5
DW            60.400 usec
DE            7.50 usec
TE            300.0 K
D1            1.0000000 sec
```

```
===== CHANNEL f1 =====
NUC1          1H
P1            9.00 usec
PL1           0.00 dB
SFO1         400.2024714 MHz
SI           32768
SF           400.2000028 MHz
WDW           EM
SSB           0
LB            0.30 Hz
GB            0
PC            1.00
```

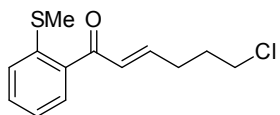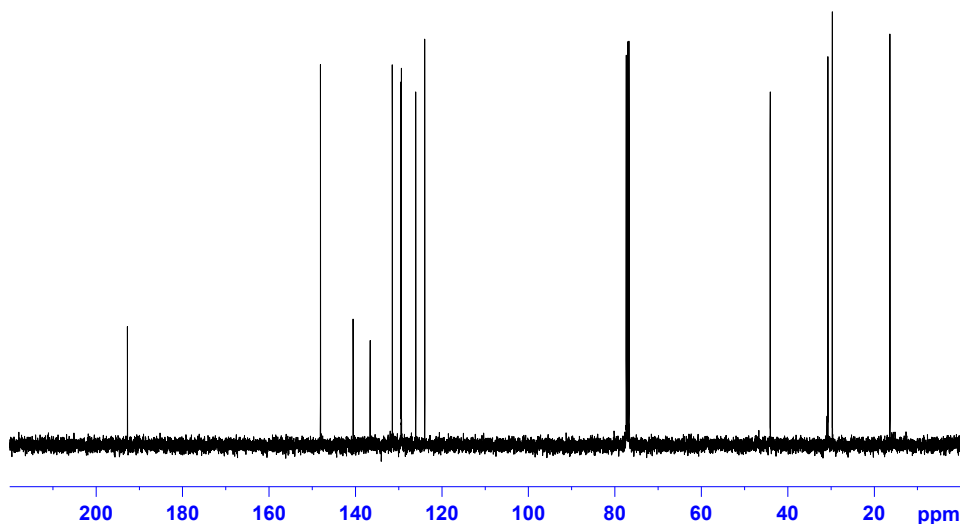

```
NAME          C12
EXPNO         3
PROCNO        1
Date_         20091110
Time_         11.01
INSTRUM       av400
PROBHD        5 mm QNP 1H/13
PULPROG       zgpg30
TD            32768
SOLVENT       CDCl3
NS            256
DS            4
SWH           26178.010 Hz
FIDRES        0.798889 Hz
AQ            0.6259188 sec
RG            32768
DW            19.100 usec
DE            7.50 usec
TE            300.0 K
D1            1.0000000 sec
D11           0.0300000 sec
TD0           1
```

```
===== CHANNEL f1 =====
NUC1          13C
P1            9.50 usec
PL1           0.00 dB
SFO1         100.6403931 MHz
```

```
===== CHANNEL f2 =====
CPDPRG2       waltz16
NUC2          1H
PCPD2         80.00 usec
PL2           0.00 dB
PL12          19.00 dB
PL13          25.00 dB
SFO2         400.2016008 MHz
SI           32768
SF           100.6303718 MHz
WDW           EM
SSB           0
LB            1.00 Hz
GB            0
PC            1.40
```

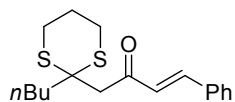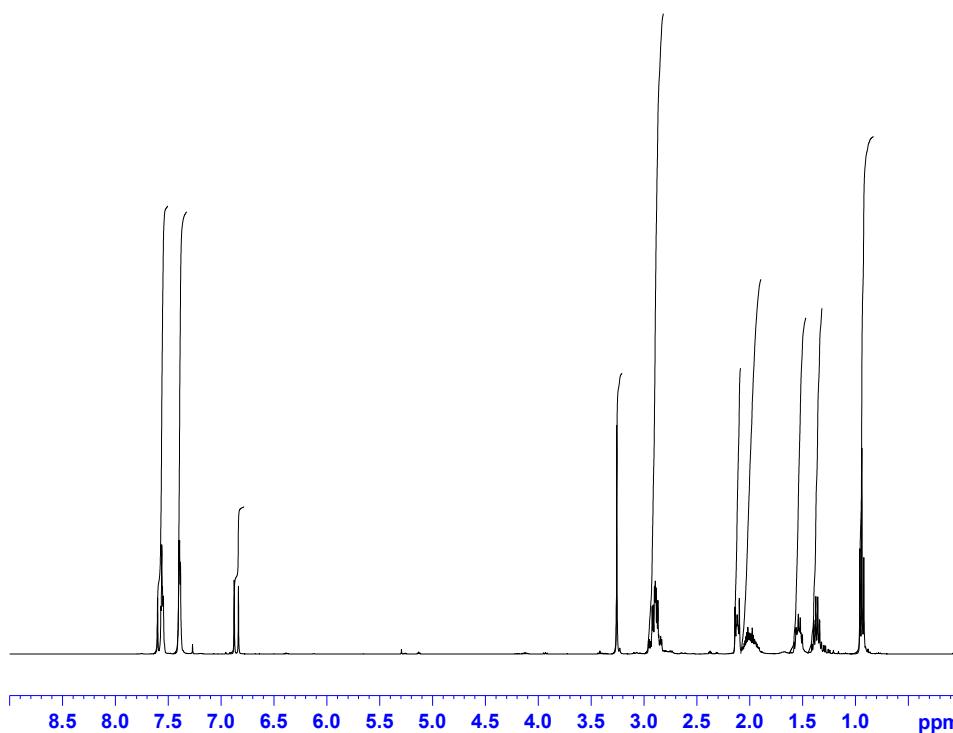

```

NAME      Aug09-2010-11
EXPNO     1
PROCNO    1
Date_     20100809
Time      13.19
INSTRUM   av400
PROBHD    5 mm QNP 1H/13
PULPROG   zg60
TD        65536
SOLVENT   CDCl3
NS        16
DS        2
SWH       8278.146 Hz
FIDRES    0.126314 Hz
AQ        3.9584243 sec
RG        35.9
DW        60.400 usec
DE        7.50 usec
TE        300.0 K
D1        1.0000000 sec
    
```

```

===== CHANNEL f1 =====
NUC1      1H
P1        9.00 usec
PL1       0.00 dB
SFO1     400.2024714 MHz
SI        32768
SF        400.2000028 MHz
WDW       EM
SSB       0
LB        0.30 Hz
GB        0
PC        1.00
    
```

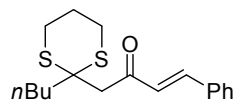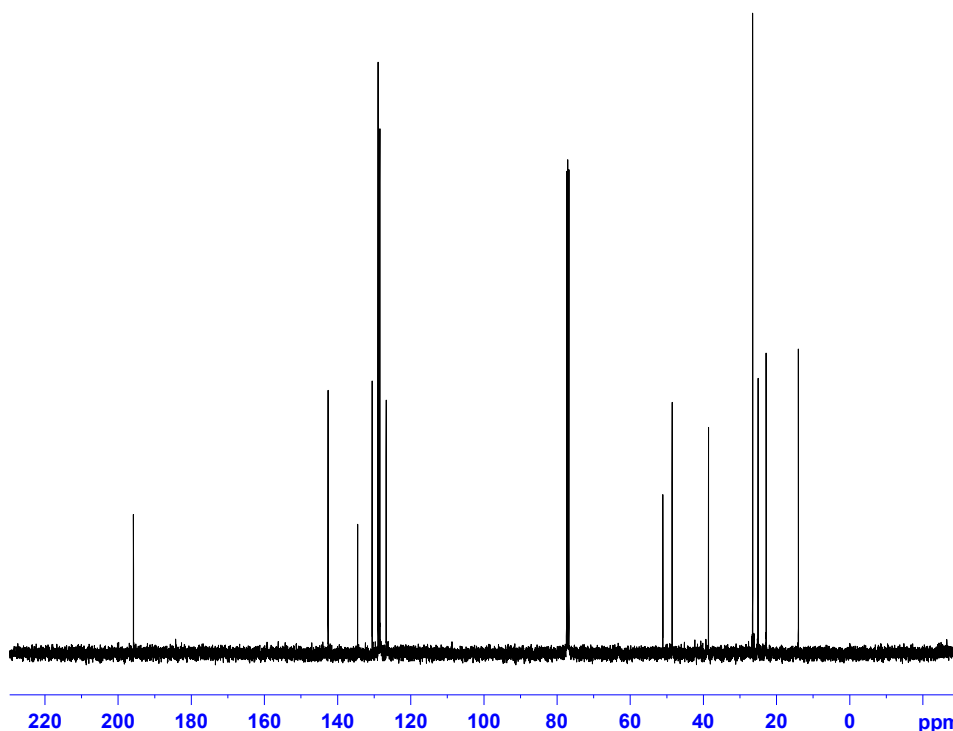

```

NAME      Aug09-2010-11
EXPNO     2
PROCNO    1
Date_     20100809
Time      13.26
INSTRUM   av400
PROBHD    5 mm QNP 1H/13
PULPROG   zgpg30
TD        32768
SOLVENT   CDCl3
NS        256
DS        4
SWH       26178.010 Hz
FIDRES    0.798889 Hz
AQ        0.6259188 sec
RG        32768
DW        19.100 usec
DE        7.50 usec
TE        300.0 K
D1        1.0000000 sec
D11       0.0300000 sec
TD0       1
    
```

```

===== CHANNEL f1 =====
NUC1      13C
P1        9.50 usec
PL1       0.00 dB
SFO1     100.6403931 MHz
    
```

```

===== CHANNEL f2 =====
CPDPRG2   waltz16
NUC2      1H
PCPD2     80.00 usec
PL2       0.00 dB
PL12     19.00 dB
PL13     25.00 dB
SFO2     400.2016008 MHz
SI        32768
SF        100.6303718 MHz
WDW       EM
SSB       0
LB        1.00 Hz
GB        0
PC        1.40
    
```

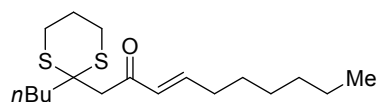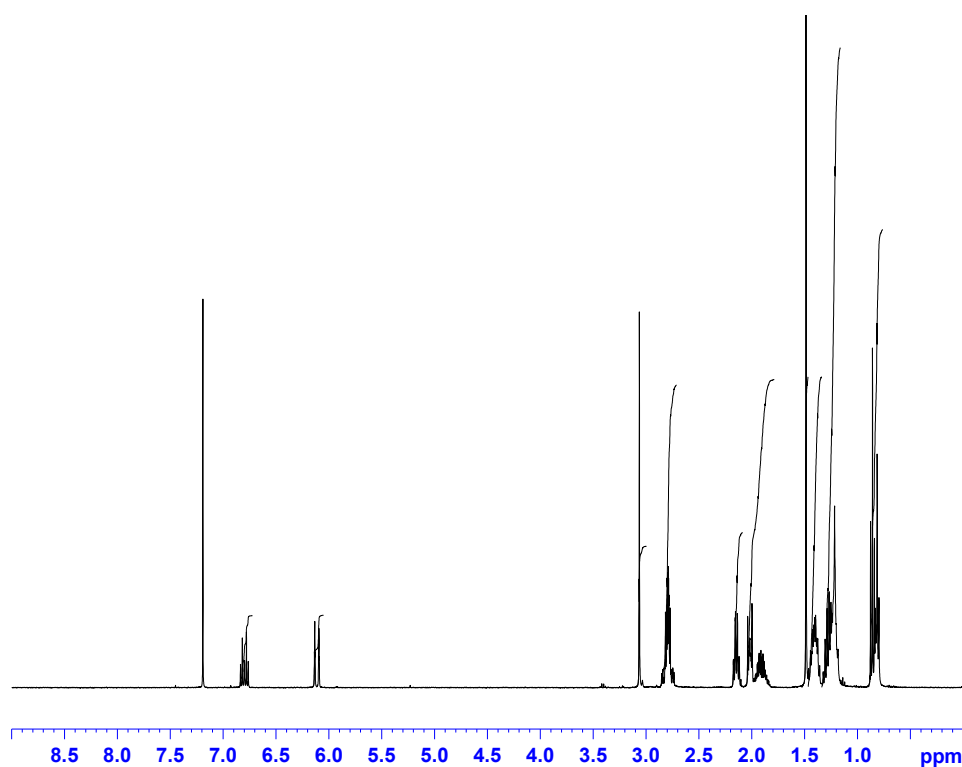

NAME Oct12-2010-55  
EXPNO 5  
PROCNO 1  
Date\_ 20101012  
Time\_ 21.21  
INSTRUM av400  
PROBHD 5 mm QNP 1H/13  
PULPROG zg60  
TD 65536  
SOLVENT CDCl3  
NS 16  
DS 2  
SWH 8278.146 Hz  
FIDRES 0.126314 Hz  
AQ 3.9584243 sec  
RG 574.7  
DW 60.400 usec  
DE 7.50 usec  
TE 300.0 K  
D1 1.0000000 sec

===== CHANNEL f1 =====  
NUC1 1H  
P1 9.00 usec  
PL1 0.00 dB  
SFO1 400.2024714 MHz  
SI 32768  
SF 400.2000337 MHz  
WDW EM  
SSB 0  
LB 0.30 Hz  
GB 0  
PC 1.00

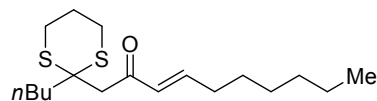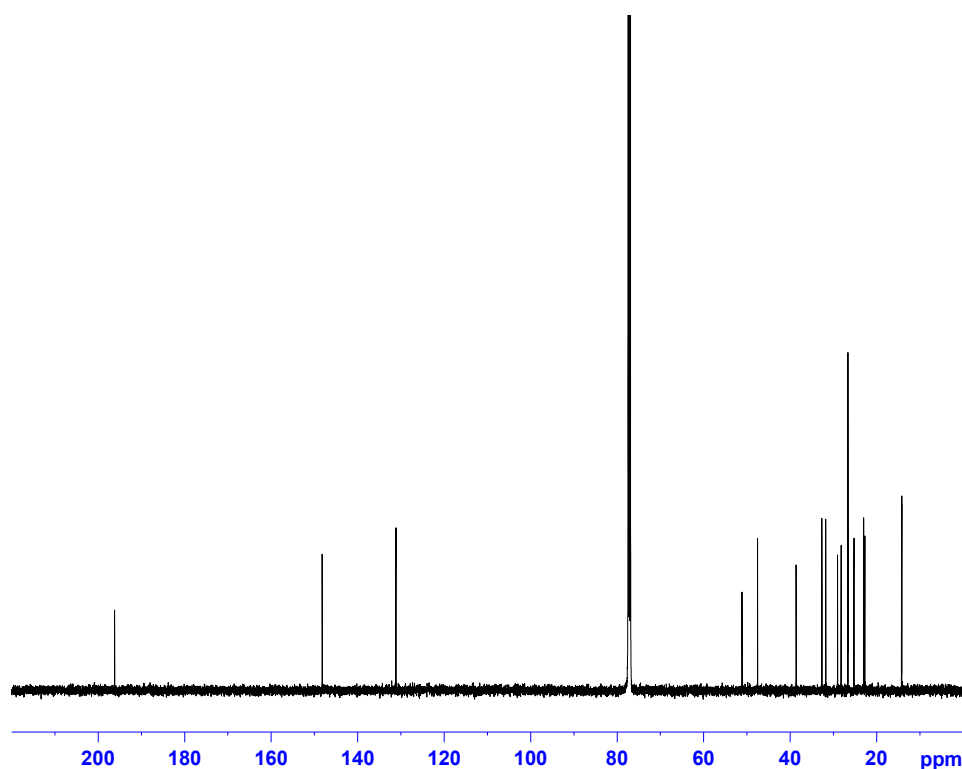

NAME p111840311  
EXPNO 1  
PROCNO 1  
Date\_ 20101104  
Time\_ 3.54  
INSTRUM avc500  
PROBHD 5 mm CPDUL 13C  
PULPROG zgpg30  
TD 65536  
SOLVENT CDCl3  
NS 512  
DS 2  
SWH 31250.000 Hz  
FIDRES 0.476837 Hz  
AQ 1.0486259 sec  
RG 1820  
DW 16.000 usec  
DE 20.00 usec  
TE 298.0 K  
D1 2.0000000 sec  
D11 0.03000000 sec  
TD0 1

===== CHANNEL f1 =====  
NUC1 13C  
P1 9.50 usec  
PL1 -4.40 dB  
PL1W 28.15752029 W  
SFO1 125.8131151 MHz

===== CHANNEL f2 =====  
CPDPRG2 waltz16  
NUC2 1H  
PCPD2 80.00 usec  
PL2 -6.00 dB  
PL12 12.42 dB  
PL13 18.42 dB  
PL2W 15.19999981 W  
PL12W 0.21869738 W  
PL13W 0.05493430 W  
SFO2 500.3020012 MHz  
SI 32768  
SF 125.8005176 MHz  
WDW EM  
SSB 0  
LB 1.00 Hz  
GB 0  
PC 1.40

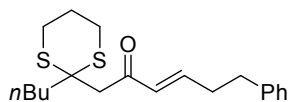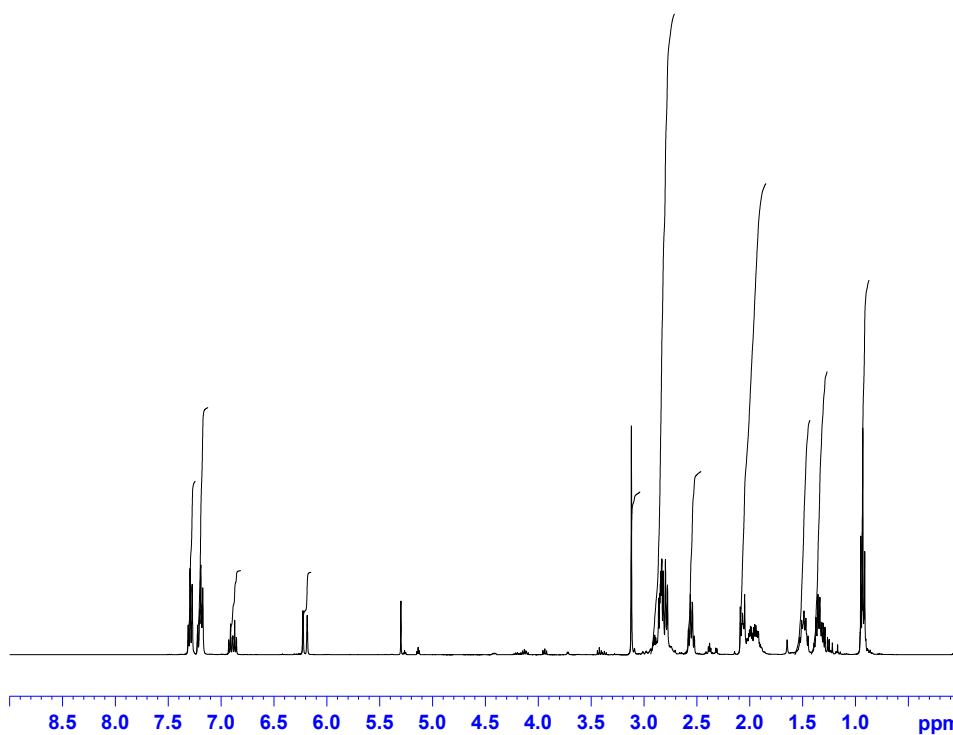

```

NAME      Aug04-2010-38
EXPNO     1
PROCNO    1
Date_     20100804
Time_     15.59
INSTRUM   av400
PROBHD    5 mm QNP 1H/13
PULPROG   zg60
TD         65536
SOLVENT   CDCl3
NS         16
DS         2
SWH        8278.146 Hz
FIDRES     0.126314 Hz
AQ         3.9584243 sec
RG         35.9
DW         60.400 usec
DE         7.50 usec
TE         300.0 K
D1         1.0000000 sec
    
```

```

===== CHANNEL f1 =====
NUC1       1H
P1         9.00 usec
PL1        0.00 dB
SFO1       400.2024714 MHz
SI         32768
SF         400.2000028 MHz
WDW        EM
SSB        0
LB         0.30 Hz
GB         0
PC         1.00
    
```

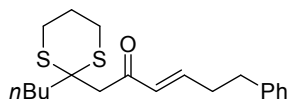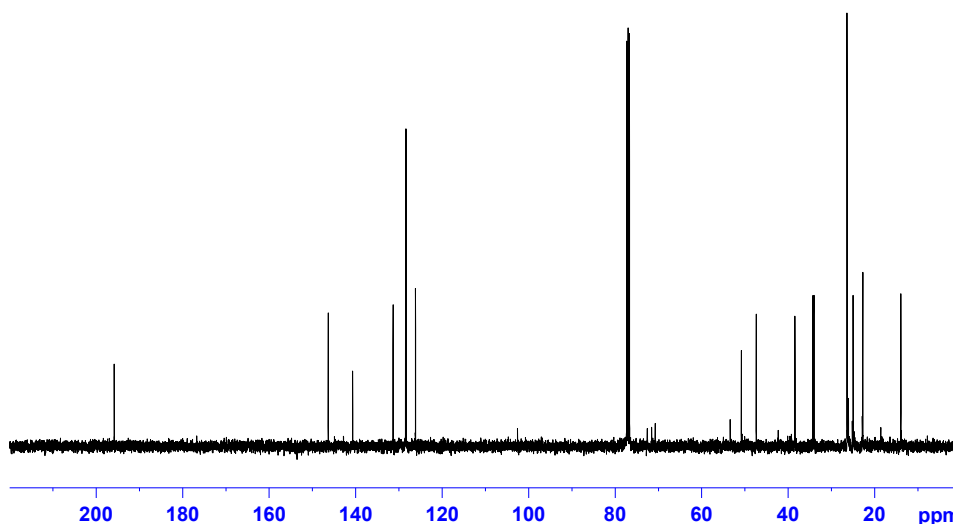

```

NAME      Aug09-2010-33
EXPNO     2
PROCNO    1
Date_     20100809
Time_     20.57
INSTRUM   av400
PROBHD    5 mm QNP 1H/13
PULPROG   zgpg30
TD         32768
SOLVENT   CDCl3
NS         256
DS         4
SWH        26178.010 Hz
FIDRES     0.798889 Hz
AQ         0.6259188 sec
RG         32768
DW         19.100 usec
DE         7.50 usec
TE         300.0 K
D1         1.0000000 sec
D11        0.0300000 sec
TD0        1
    
```

```

===== CHANNEL f1 =====
NUC1       13C
P1         9.50 usec
PL1        0.00 dB
SFO1       100.6403931 MHz
    
```

```

===== CHANNEL f2 =====
CPDPRG2    waltz16
NUC2       1H
PCPD2      80.00 usec
PL2        0.00 dB
PL12       19.00 dB
PL13       25.00 dB
SFO2       400.2016008 MHz
SI         32768
SF         100.6303718 MHz
WDW        EM
SSB        0
LB         1.00 Hz
GB         0
PC         1.40
    
```
